# Supplementary material for: Myopalladin knockout mice develop cardiac dilation and show a maladaptive response to mechanical pressure overload
Source: eLife. 2021 Sep 24;10:e58313. doi: 10.7554/eLife.58313 (PMC8547954; doi:10.7554/eLife.58313)
Supplement: Figure 1—source data 1. [file elife-58313-fig1-data1.xlsx]

## Sheet: Figure 1B, C
Figure 1–source data 1: MST analysis of MYPN/titin interaction.
B, left	MST assay with 450 nM labeled titin Ig Z4-Z5
	[MYPN] (nM)	ΔFnorm	SEM
	10	0.118267	0.0266146
	20	0.170774	0.0297168
	39	0.10919	0.0385595
	78	0.145037	0.0183906
	156	0.0746978	0.0322712
	312	0.100941	0.0131899
	625	0.152292	0.0116925
	1250	0.135976	0.0214364
	2500	0.402697	0.02727
	5000	0.600247	0.0310987
	10000	0.93095	0.0207041
	20000	0.965521	0.0162421
B, right	MST assay with 450 nM labeled titin Ig Z4-Z5
	[PALLD] (nM)	ΔFnorm	SEM
	14	0.0562384	0.0128696
	29	0.0220476	0.00636145
	58	0.0315676	0.00582066
	117	0.0496527	0.0167085
	284	0.0496845	0.0158016
	468	0.0704946	0.0252174
	937	0.115049	0.0302563
	1875	0.194606	0.0448466
	3750	0.393716	0.0555653
	7500	0.64187	0.0493786
	15000	0.940282	0.0152948
	30000	0.994432	0.0038354
C	MST assay with 400 nM labeled MYPN
	[Titin Ig Z4-Z5] (nM)	ΔFnorm	SEM
	9	0.051747	0.0889821
	18	0.02521	0.0801604
	36	0.0521377	0.101684
	73	0.0687338	0.107813
	146	0.0813535	0.115127
	293	0.0493307	0.109563
	586	0.0824363	0.095857
	1172	0.106617	0.0564769
	2344	0.310623	0.0679228
	4687	0.612022	0.113719
	9375	0.865499	0.194632
	18750	0.708327	0.0682493
	37500	0.986794	0.124293
	75000	0.972032	0.104106
	150000	0.496855	0.0970915
