# Supplementary material for: Myopalladin knockout mice develop cardiac dilation and show a maladaptive response to mechanical pressure overload
Source: eLife. 2021 Sep 24;10:e58313. doi: 10.7554/eLife.58313 (PMC8547954; doi:10.7554/eLife.58313)
Supplement: Figure 2—source data 1. [file elife-58313-fig2-data1.xlsx]

## Sheet: Figure 2B-E
Figure 2–source data 1: CMC size measurements in WT and MKO male mice.
B-E	CMC size (μm2)			CMC length (μm)			CMC width (μm)
	WT	MKO		WT	MKO		WT	MKO
	3268.7	1811.6		132	189		15.9	25.7
	2559.9	2323.6		139	114		23.4	46.8
	1299.6	2638.6		116	142		13.3	33.8
	2559.9	1811.6		93	195		17.2	25.6
	2678	2638.6		128	72		23.6	22.5
	3426.3	1851		101	126		35.7	37.4
	2205.4	2599.2		142	141		17.2	31.1
	2874.9	1969.1		112	85		32.4	35.6
	4450.2	1102.7		123	92		37.7	33.1
	4725.9	1890.4		96	94		22.9	22.6
	2284.2	1614.7		96	143		24.1	33.1
	1181.5	2520.5		74	114		29	31.4
	1142.1	1969.1		149	135		39.1	27.9
	2638.6	2520.5		110	133		15.1	32
	4450.2	2323.6		150	100		26.1	19.8
	3741.3	1890.4		174	104		15.4	33.2
	1811.6	2166		131	103		23.1	23.4
	1890.4	2284.2		107	129		13.8	24.7
	4017	2402.3		150	126		28.3	17.2
	2874.9	3386.9		175	156		22.5	24.1
	2993.1	3505		146	194		24.3	18.4
	2008.5	2481.1		69	145		32.9	16.8
	4017	4095.8		135	205		33.7	11.9
	1929.7	1023.9		175	142		12.2	21.3
	1732.8	2835.5		163	170		26.8	25.7
	1614.7	2914.3		82	141		30	45
	3701.9	3505		101	150		15.9	31.8
	4292.7	4017		99	182		16.1	14.2
	4095.8	1811.6		110	108		19.8	21.8
	4489.6	1851		171	122		25.4	25.1
	3071.8	3465.7		135	208		11.4	12.2
	3032.4	4017		157	132		10.3	13.6
	1693.4	2678		100	94		34.6	22
	2835.5	2205.4		70	152		22.2	36
	2914.3	2008.5		133	147		13.2	45.1
	2441.7	2756.8		152	124		44.4	15.9
	2323.6	2914.3		153	126		39.8	21.9
	3583.8	4686.5		128	167		22.6	14.6
	2402.3	2796.2		105	116		28.1	15.5
	2244.8	2166		99	146		28.6	17.3
	3229.4	3071.8		61	129		29	15.4
	1181.5	3111.2		130	116		26.8	35
	5868	4056.4		117	125		24.7	15.5
	3111.2	2166		84	157		22.6	18.7
	1772.2	3701.9		108	128		19.7	26.8
	3190	2835.5		134	123		25	16.4
	2638.6	3544.4		138	144		27.3	14.2
	1693.4	5159.1		141	164		13	26.4
	2126.6	1457.1		139	185		18.4	45
	2953.7	3111.2		97	120		26.4	26.2
	2835.5	4371.4		66	150		16.1	27.2
	3741.3	2638.6		138	137		26	36.1
	3032.4	4647.1		161	138		19.8	32
	6104.3	5040.9		158	139		39.5	28.4
	4489.6	1417.8		84	96		31.4	17.3
	2638.6	2914.3		162	104		23.1	25.4
	3741.3	2993.1		130	100		8.9	28.4
	5749.8	4017		139	109		19.7	29.1
	2402.3	4844		126	121		11.3	21.7
	3741.3	2914.3		108	96		39.8	21.5
	2638.6	4883.4		178	133		21.2	20.5
	1654.1	3308.1		81	130		14.8	22.5
	4017	2047.9		142	122		22	20.7
	3859.5	3347.5		124	154		12.5	31.8
	3701.9	4844		113	73		27.9	22.2
	2047.9	4647.1		166	125		21.2	15.9
	2284.2	1969.1		116	150		27.1	29
	3741.3	4450.2		197	137		23.1	24
	2993.1	2678		205	65		26.5	42.4
	1693.4	3386.9		118	122		20.2	36.1
	1654.1	4017		88	105		46.3	19.9
	2205.4	2047.9		111	108		20.2	15.1
	4253.3	905.8		112	77		37.3	19.7
	3032.4	1654.1		118	143		24.4	22.5
	3032.4	2205.4		113	154		28.1	26.8
	2559.9	1693.4		152	187		35	22.5
	4253.3	2205.4		113	176		25.1	42
	3741.3	2205.4		123	104		31.8	26.6
	2087.3	866.4		198	172		20.9	23.6
	2638.6	2087.3		119	151		34.3	21.2
	3938.2	2678		136	149		26.5	15.1
	4765.3	4489.6		118	107		16.1	21.9
	2520.5	2914.3		150	108		19.8	24.7
	4253.3	3701.9		83	164		19.7	18
	3308.1	2441.7		91	112		26.6	16.1
	4489.6	2244.8		106	98		15.9	21.2
	3308.1	3780.7		102	158		11.3	17.3
	4410.8	2166		172	94		42.6	26.1
	2678	1969.1		133	136		33.7	14.2
	2835.5	2678		123	167		26.8	23.1
	3938.2	1417.8		132	123		33.5	44
	2914.3	3544.4		172	158		15.5	17.8
	2953.7	4489.6		132	165		20.7	28.3
	3386.9	3623.2		147	114		17.3	15
	2678	5513.5		153	100		16.1	14.3
	3465.7	2441.7		125	144		14.8	27.8
	3623.2	2520.5		124	68		10.9	16.6
	2756.8	3662.6		121	127		22.6	11.3
	2441.7	4962.2		215	103		36	15.5
	3505	3583.8		80	192		16.1	19.7
	2796.2	4410.8		118	162		26	39.3
	4095.8	4371.4		106	169		15.1	16.9
	3977.6	3623.2		156	152		28.3	31
	4410.8	1772.2		121	160		20.2	19.8
	3505	3623.2		143	118		16.4	19.8
	3190	6064.9		157	146		28.1	17.8
	3701.9	3308.1		121	113		13.3	33.9
	3898.9	3229.4		113	126		14.8	25.3
	3938.2	3938.2		85	84		33.4	18.7
	2874.9	2402.3		125	182		33.7	18
	2559.9	3150.6		124	113		15.9	15.1
	2244.8	2481.1		143	136		19.8	25.7
	2441.7	2993.1		150	153		22	17.3
	3268.7	3111.2		118	169		29.8	20
	5159.1	3701.9		209	200		18.7	17.8
	3505	2362.9		126	132		17.3	19.3
	6261.8	3426.3		103	107		18	15.9
	1732.8	2244.8		142	84		17.3	26.2
	1339	2284.2		148	135		21.4	18.4
	6852.5	2559.9		127	76		27.2	26.1
	3386.9	2284.2		134	87		24.1	25.7
	3544.4	3111.2		134	172		15.4	21.5
	1890.4	3938.2		139	175		22.6	22.8
	3820.1	2481.1		172	107		25.4	14.6
	2126.6	3190		107	137		15.4	14.2
	5237.9	1654.1		151	184		24.3	17.8
	1929.7	4332.1		106	149		22	15.1
	2717.4	2835.5		114	186		14.6	15.9
	1102.7	3032.4		132	148		25.4	23.8
	1811.6	2796.2		127	156		20.7	20.9
	3111.2	2559.9		121	183		16.9	24.4
	3308.1	1378.4		99	115		14.6	27.3
	2678	4056.4		153	89		40.8	24.9
	1339	3780.7		110	128		24.7	24
	3465.7	1535.9		162	159		29.4	31.2
	6852.5	3308.1		141	159		23.1	24.1
	2402.3	4371.4		151	156		13.3	26.4
	3465.7	1732.8		205	121		28	34.4
	3386.9	2559.9		120	164		31.8	26
	2599.2	2323.6		117	151		15	25.4
	4135.2	2756.8		139	130		34.3	19.8
	1339	3583.8		107	154		26.8	23.1
	2993.1	3150.6		200	203		26.4	31.2
	3465.7	3544.4		179	101		19.5	19.8
	827	2599.2		140	181		21.8	16.1
	3977.6	3623.2		129	125		19.8	23.4
	2796.2	2402.3		120	144		17.8	17.8
	3308.1	4529		195	175		23.1	23.4
	3268.7	1890.4		121	142		29.4	15.9
	5080.3	4922.8		104	164		21.8	26.3
	2993.1	2441.7		114	103		18.9	15.1
	2441.7	3347.5		133	209		17.8	19.7
	1220.9	4804.7		129	116		20.2	27.2
	4017	1496.5		145	127		13.2	18
	5277.2	5198.5		144	130		27.3	25.4
	2047.9	2323.6		156	157		15.1	15.1
	3071.8	3465.7		143	131		21.5	25
	1496.5	1614.7		184	102		29.6	38.6
	2796.2	3465.7		92	89		31.9	25.7
	3386.9	3505		162	104		22.2	33.1
	5552.9	2323.6		118	104		21.4	19.3
	1220.9	1969.1		164	125		17.3	26.1
	2087.3	3229.4		173	159		32	20.2
	3229.4	2835.5		134	139		14.6	17.2
	2362.9	3150.6		126	146		17.4	27.3
	1654.1	2559.9		118	142		24.3	16.9
	5080.3	3544.4		182	142		22.5	31.9
	2244.8	2402.3		116	98		19.3	46.1
	4095.8	7088.8		78	169		18.5	23.1
	1535.9	1969.1		127	156		9.6	27.3
	2835.5	2678		138	116		43.3	24.6
	2993.1	1772.2		170	84		14.6	14.1
	1890.4	6537.5		137	131		11.4	12.5
	2835.5	4213.9		90	167		36.4	19.9
	2362.9	2402.3		141	169		13.2	23.1
	2323.6	3623.2		105	142		19.9	24.4
	3150.6	3150.6		129	108		22.6	16.7
	2756.8	1851		105	187		25.1	25.4
	2717.4	3820.1		85	115		26.2	34.5
	1378.4	2796.2		105	86		40.6	29.4
	905.8	3190		106	181		26.8	15.9
	1772.2	2638.6		150	159		10.9	12.2
	2914.3	3465.7		135	151		28.4	17.4
	3859.5	2756.8		84	131		22.8	17.8
	2835.5	6301.2		151	141		28.5	19.7
	4410.8	1417.8		66	117		13.2	20.2
	4686.5	3190		130	141		59.4	15.9
	2441.7	1457.1		78	121		20.9	34.1
	2284.2	6419.3		125	132		48.2	18.9
	512	2717.4		103	160		19.7	19.3
	3308.1	4450.2		197	159		23.9	24
	4844	1614.7		190	160		41.1	17.8
	2756.8	2717.4		137	222		8	15.9
	3544.4	3347.5		90	69		16.9	15.1
	3426.3	2559.9		106	109		14.2	24.4
	3308.1	3229.4		74	166		12.2	25.3
	3268.7	3308.1		145	113		19.8	23.1
	1535.9	2835.5		129	138		24.3	14.3
	5001.6	3662.6		82	133		16.1	17.3
	4607.7	2441.7		143	164		20.2	27.8
	4725.9	2441.7		161	122		23.1	9.5
	4529	1535.9		163	118		22.8	25.3
	1890.4	2126.6		130	134		22	12.2
	2323.6	1654.1		76	114		35.6	13.8
	1535.9	3308.1		186	115		16	16.4
	2323.6	3308.1		160	128		32.2	17.7
	2638.6	2520.5		79	128		23.4	20.5
	3859.5	2638.6		164	94		17.2	27.3
	2284.2	2835.5		130	105		36	15
	3150.6	3229.4		144	167		27.8	23.9
	2874.9	827		235	138		18.9	35.7
	3386.9	5513.5		110	92		22.6	24.7
	3465.7	2796.2		173	141		24.9	24.6
	2835.5	4017		118	144		26.6	14.1
	2756.8	2520.5		154	112		19.1	28
	4410.8	2047.9		87	186		14.3	14.6
	3190	2914.3		150	104		24.4	36.3
	4725.9	2520.5		167	138		16.7	20.7
	1378.4	3150.6		136	97		16.1	17.2
	5316.6	3386.9		161	106		51.1	18.5
	3662.6	1732.8		125	168		17.2	15.9
	3662.6	3386.9		141	127		20.7	23.1
	6183	2244.8		164	150		33.1	16.1
	9254.9	2284.2		91	126		10.7	20.7
	2205.4	2284.2		92	126		29.8	33.9
	2874.9	2166		93	174		13.8	13.2
	1535.9			121	182		23.4	39.9
	4095.8	3505		151	112		19.8	14.6
	905.8	4686.5		117	116		13.6	22.8
	3465.7	3229.4		110	168		16.8	15.1
	3268.7	3347.5		134	144		34.9	19.1
	2678	5631.7		152	165		12.2	33.4
	4529	4332.1		105	201		24.4	24.4
	2993.1	3426.3		91	99		19.7	18.4
	2796.2	5040.9		96	104		13.5	13.5
	2126.6	2874.9		119	150		20.2	24.4
	4883.4	3505		108	167		17.8	22.5
	2756.8	4017		137	121		23.1	29.1
	4135.2	4804.7		163	153		36.1	27.5
	2756.8			139	106		18	26.5
	1339	3426.3		163	115		21.3	16
	1260.2	3701.9		69	124		15.9	18.9
	3662.6	5356		187	114		22.5	14.8
	3544.4	2284.2		88	141		28	26.5
	1417.8	2638.6		168	127		25.6	19.1
	4450.2	4253.3		141	150		26.4	15.1
	2756.8	2244.8		127	122		19.1	16.7
	1378.4	3150.6		109	115		20.9	17.8
	2402.3	2796.2		131	157		9.6	22.2
	2008.5	2993.1		174	127		25.3	17.8
	1142.1	3859.5		124	142		16.7	12.2
	984.6	3741.3		131	174		29.6	18.7
	708.9	3938.2		170	114		20.9	13.6
	2441.7	2717.4		154	132		20.2	20.5
	4332.1	3032.4		154	135		23.7	35.7
	2047.9	3780.7		81	161		8.5	23.1
	1535.9	3898.9		81	163		32	20
	2638.6	1732.8		91	137		18.4	17.8
	3859.5	1811.6		163	113		27.9	26.1
	3741.3	3308.1		136	102		18.8	29.7
	3386.9	3898.9		129	121		26.1	13
	3701.9	3741.3		147	159		20.5	13.6
	1890.4	3741.3		164	140		21.3	28.3
	3662.6	4529		144	161		24	24.3
	6458.7	1929.7		141	171		22.5	16.4
	4804.7	3308.1		159	109		38.5	32.2
	2756.8	3898.9		116	142		34.9	21.3
	3386.9	2362.9		126	165		23.1	17.8
	5080.3	3898.9		133	136		31.9	35.6
	3662.6			120	106		29	15.1
	3741.3	1457.1		156	79		41.5	25.4
	1417.8	2678		163	117		20.6	23.7
	2559.9	2323.6		97	147		22.8	15.1
	4410.8	2914.3		105	80		15.1	22.8
	2599.2	2717.4		101	147		22	21.3
	2599.2	1535.9		98	100		24.9	36.1
	2126.6	1535.9		112	108		15.1	29.3
	3859.5	1535.9		122	93		26.5	29.2
	3780.7	3977.6		135	138		28.3	12.5
	1732.8	2481.1		174	116		17.3	18
	2559.9	2717.4		124	126		21.5	32.4
	3820.1	5671.1		142	143		26.6	21.4
	3032.4	3820.1		108	118		28.5	26.8
	2559.9	6261.8		102	132		16.1	22.5
	3938.2	3623.2		118	138		15.1	18.5
	4292.7	3071.8		94	176		15.9	18.9
	4686.5	5395.4		133	120		29.1	20.2
	2323.6	2323.6		137	85		30.9	20.2
	4647.1	1772.2		126	115		15.9	18.7
	3583.8	3583.8		147	164		31.4	29.7
	4450.2	2402.3		108	113		29.3	26.1
	4292.7	3386.9		111	167		37	19.5
	3780.7	2953.7		148	154		27.3	17.3
	2993.1	3190		95	154		37.6	19.1
	5080.3	5316.6		142	113		10.3	12.5
	2678	3820.1		103	164		44	22.5
	2008.5	3820.1		193	81		20.5	21.3
	3938.2	4686.5		158	119		46.2	17.3
	3820.1	3190		225	113		19.7	15.1
	2205.4	5710.4		126	212		22.5	14.2
	1496.5	5789.2		129	160		23.9	18.7
	3229.4	5631.7		176	176		14.8	20.9
	3505	5474.2		95	128		21.4	30.5
	2993.1	1614.7		151	126		37.4	16.6
	2993.1	5907.4		103	111		13.2	13.2
	4371.4	3071.8		113	162		18	17.2
	1890.4	6379.9		162	102		16.4	20.9
	2559.9	4883.4		179	107		28.3	18
	5828.6	5513.5		128	102		34.9	25.3
	3701.9	4844		150	139		20.5	28
	2481.1	5789.2		121	140		28.3	13.8
	2717.4	7403.9		171	134		22.5	29
	3662.6	4647.1		247	67		18.9	11.4
	2402.3	3898.9		105	136		33.2	34.4
	2362.9	1378.4		165	173		35.3	21.9
	3268.7	6655.6		141	114		18	27.8
	3465.7	5159.1		167	103		26.8	22.6
	2362.9	5631.7		79	129		18.4	23.8
	3505	2599.2		147	162		20.9	32.7
	3465.7	3150.6		95	106		29.4	29.1
	3583.8	3859.5		118	160		29.1	15.9
	2559.9	4450.2		137	81		46.1	28.1
	2559.9	3741.3		96	89		22.6	28.1
	4017	2205.4		130	125		29.7	17.2
	3583.8	4095.8		145	91		14.8	30.8
	4725.9	2559.9		101	175		9.4	27.1
	2126.6	3032.4		83	128		28	30.5
	2796.2	1142.1		107	149		15.5	16.6
	2914.3	2756.8		158	149		23.9	29.6
	2717.4	2914.3		91	111		21.5	17.3
	2362.9	4017		124	110		25.4	13.3
	3426.3	1693.4		75	103		13.2	18.9
	3662.6	3859.5		90	151		32	21.5
	3780.7	3859.5		100	103		35.6	16.1
	2638.6	3505		146	133		32.7	29.6
	2323.6	2205.4		113	166		31.8	11.4
	8427.8	3898.9		84	160		15.5	19.5
	2244.8	4056.4		110	196		44.1	28.5
	1575.3	1851		95	108		14.1	21.5
	1457.1	1654.1		146	110		37.1	20.6
	4371.4	1260.2		131	91		19.7	17.8
	3544.4	3465.7		154	115		18.4	21.7
	6655.6	5789.2		146	140		19.9	21.5
	1732.8	4568.4		134	162		15.1	20.9
	2087.3	3150.6		79	151		44.1	23.1
	2678	3583.8		166	157		23.8	19.5
	4489.6	3938.2		182	140		13.2	36.8
	2756.8	2599.2		124	99		29.1	19.3
	3898.9	3308.1		121	131		14.8	27.6
	4017			135	134		11.8	14.8
	2126.6	4607.7		153	140		27.3	20.7
	4568.4	1378.4		158	134		23.9	25.3
	1851	3859.5		88	159		29.6	11.4
	4568.4	2520.5		165	128		28.5	18.9
	4489.6	6301.2		162	208		13.3	28.3
	2087.3	3111.2		110	178		30.2	20.5
	2638.6	2087.3		76	102		20.6	19.5
	905.8	4056.4		119	149		34.7	27.3
	2914.3	3465.7		109	123		28.4	15.1
	1890.4	3032.4		167	151		30.9	16.6
	1890.4	3505		120	105		31.2	29.3
	4765.3	4804.7		118	156		16.7	18.4
	2126.6	4410.8		108	145		28.1	26
	4922.8	4174.5		83	173		28.3	14.6
	3268.7	5395.4		145	124		24.3	29
	2717.4			118	121		21.2	18
	2441.7	1811.6		122	114		33.7	18
	1811.6	3544.4		136	86		16.7	21.7
	2599.2	2717.4		116	136		26.8	24.4
	2402.3	3229.4		110	111		19.5	37.9
	2796.2	3859.5		153	152		24.3	29
	3465.7	3898.9		174	144		27.3	26.5
	4292.7	1929.7		131	105		22.8	21.7
	3583.8	3150.6		127	151		18.8	19.1
	3190	4213.9		98	100		21.5	28
	6340.6	2914.3		126	114		28.1	20.9
	2166	2520.5		183	130		16.1	17.2
	3190	5198.5		124	175		22.5	23.4
	4292.7	6655.6		124	108		31.4	30.9
	4332.1	4725.9		162	128		32.7	35.6
	2638.6	1890.4		72	120		18	29.3
	2874.9	3190		155	106		32.5	12.5
	2284.2	3190		89	147		12.6	20.9
	4450.2	3268.7		62	123		29.7	23.9
	2520.5	3386.9		175	179		16	21.3
	2481.1	4647.1		132	121		31.4	14.1
	2717.4	2914.3		94	135		25.2	19.1
	2441.7	905.8		97	175		19.3	33.8
	984.6	3386.9		130	91		17.2	23.4
	2087.3	5552.9		133	117		31.1	22
	3268.7	3347.5		111	118		26.6	16.9
	3426.3	3229.4		144	144		15.4	23.4
	1890.4	2717.4		156	91		20.7	21.4
	3820.1	2638.6		116	128		18.4	27.2
	3544.4	3426.3		230	144		16	14.2
	3150.6	2599.2		90	122		15.1	22.6
	3347.5	6222.4		170	93		38.7	14.8
	3032.4	4017		142	142		18.9	24.1
	2559.9	1851		88	117		14.8	28.5
	3505			179	198		18.8	18.4
	2559.9	4647.1		177	190		26.8	22
	2441.7	2638.6		198	136		23.9	19.1
	1575.3	4213.9		99	129		12	23.1
	3190	6695		114	195		20.2	23.1
	1811.6	3623.2		151	188		16	21.3
	2481.1	4095.8		179	161		21.3	26.6
	4017			166	106		26.6	23.1
	4844	3505		105	110		23.4	15.1
	2638.6	2441.7		93	175		19.3	25.1
	4450.2	2244.8		134	152		20.5	32.9
	3111.2	2087.3		174	135		13.3	21.5
	2323.6	2166		151	142		11.8	35.2
	2953.7	4135.2		114	131		20.6	17.4
	2008.5	2441.7		139	179		15.9	21.4
	3701.9	5710.4		162	177		27.2	31.6
	3505	3465.7		130	137		22.2	16.7
	2047.9	1772.2		111	151		24.9	14.8
	3426.3	4489.6		159	129		21.2	11.8
	2087.3	2087.3		143	127		30.9	16.7
	2835.5	3111.2		138	140		26.2	18.9
	1614.7	3190		150	181		23.4	33.2
	1339	5001.6		156	141		39.6	18.7
	4450.2	3347.5		134	141		22.6	18
	5671.1	5395.4		103	171		34.6	28.4
	4607.7	2953.7		187	95		26.6	39.1
	2008.5	3347.5		140	101		23.4	22.6
	4213.9	3662.6		132	128		31.4	19.5
	1457.1	1811.6		108	149		27.8	20.5
	3308.1	2047.9		111	126		36.1	33.9
	3426.3	2402.3		147	113		28.6	23.8
	3780.7	2441.7		161	196		14.1	31.8
	3190	3583.8		96	172		13.2	20.2
	3426.3	4410.8		105	182		20.9	26
	3268.7	1811.6		146	180		26.2	19.8
	3465.7	2087.3		101	95		25.2	23.4
	3583.8	2481.1		154	132		20	19.8
	2678	3544.4		94	122		17.3	20.2
	3071.8	2717.4		98	173		24.6	34.7
	4213.9	3701.9		105	143		13.2	54.8
	3859.5	2914.3		84	136		17.4	34.9
	4607.7	3190		82	110		18.9	18.6
	5198.5	2835.5		114	124		20.2	21.3
	2402.3	3898.9		150	144		17.3	17.8
	3308.1	1772.2		116	167		18.6	18.7
	2047.9	3977.6		136	134		11.3	24.7
	3623.2	3426.3		97	86		26.5	24.6
	4292.7	4568.4		71	143		22.5	12.5
	2244.8	5198.5		89	189		20.2	28.6
	3150.6	4174.5		117	147		20.2	39.8
	2874.9	5277.2		141	189		25.2	33.2
	3623.2	5080.3		134	174		19.3	28.6
	5316.6	4017		99	114		15.9	25.4
	4844	7167.6		127	146		20.6	0
	2166	2362.9		132	228		21.7	31
	2953.7	1732.8		136	89		20.2	22.8
	4765.3	5868		125	118		12.2	29.6
	3859.5	3583.8		105	156		15.5	27.2
	2087.3	1732.8		99	122		20.7	21.3
	3859.5	1260.2		124	120		18.9	16.1
	2362.9	2087.3		210	99		33.8	27.5
	2126.6	4647.1		147	142		34.5	29.7
	4962.2	3229.4		178	73		18.6	31.9
	2756.8	1890.4		114	118		30.5	18.9
	3505	3623.2		164	82		15.9	38.6
	2520.5	6419.3		96	179		20.7	16.4
	3150.6	2559.9		137	111		20.7	27.9
	3544.4	1181.5		121	118		13.8	26.8
	2756.8	5789.2		0	180		24.3	35.5
	2796.2	5198.5		118	113		21.4	17.2
	5552.9	2914.3		0	148		18.8	25.2
	3977.6	2835.5		158	73		12.6	53.5
	4962.2	2756.8		129	108		23.6	26.2
	3662.6	5789.2		171	123		17.7	30.5
	4647.1	4844		123	161		18	21.3
	2993.1	3347.5		149	173		14.1	31.8
	3032.4	1457.1		1	81		12.2	23.8
	4371.4	5789.2		184	91		29.1	31.2
	2284.2	7522		118	129		24.3	27.8
	3229.4	4371.4		123	132		18.8	32.3
	3583.8	4056.4		131	148		18.6	36.1
	4095.8	2481.1		150	164		20.7	17.8
	4253.3	5316.6		128	99		25.4	39.9
	3111.2	6616.2		132	136		15.1	22.8
	2874.9	2914.3		167	118		20.7	23.4
	1890.4	3662.6		147	132		14.1	28
	2599.2	3820.1		148	131		23.4	31.4
	2638.6	4095.8		155	146		25	36.9
	2402.3	945.2		125	133		18.9	18.9
	3190	4135.2		89	159		19.1	33.2
	1851	3032.4		140	132		23.6	25.3
	2559.9	2481.1		97	107		34.3	21.9
	4371.4	4489.6		122	167		22.8	21.9
	2796.2	3505		134	180		30.2	36.5
	1969.1	4213.9		114	137		16	25.3
	2599.2	5946.7		192	132		27.2	25.7
	4410.8	6222.4		132	134		22.5	23.1
	5159.1	4017		107	159		37.7	15.4
	2047.9	2126.6		166	157		20.7	19.5
	3780.7	2126.6		97	148		18.5	30.2
	3268.7	2481.1		140	179		17.3	26.6
	5080.3	1851		106	146		25.7	15.1
	4135.2	3820.1		132	139		29.1	24.3
	2835.5	3465.7		138	200		27.1	17.2
	3780.7	2678		137	177		20.9	14.8
	2756.8	2678		136	232		26.8	31.4
	3741.3	2362.9		84	209		31.6	21.9
	3268.7	2953.7		107	140		13.1	23.6
	4174.5	2323.6		95	135		10.9	22.8
	2914.3	3701.9		128	146		31.8	28.1
	4371.4	3898.9		130	132		27.6	14.3
	2835.5	9924.4		107	197		24.6	24.3
	3071.8	4686.5		150	91		8.5	43.1
	2481.1	4804.7		103	137		33.3	15
	2599.2	1102.7		141	176		21.3	30.7
	3741.3	2717.4		114	201		30.5	20.9
	3780.7	1772.2		139	139		17.8	17.2
	2638.6	1851		126	139		24.4	18.6
	2559.9	2166		160	133		35.6	21.7
	4607.7	3662.6		132	201		23.6	24.4
	2993.1	2087.3		77	128		27.8	15.9
	3386.9	3662.6		100	123		28	14.3
	3229.4	1575.3		162	110		21.5	22.8
	3150.6	1339		111	159		29.4	24.1
	1575.3	2205.4		123	192		23.8	21.9
	4489.6	5040.9		105	185		19.7	17.8
	1732.8	5159.1		109	94		28.6	20.2
	3662.6	2441.7		142	180		10.3	17.2
	2087.3	3111.2		193	0		26.3	30.9
	3741.3	2205.4		131	174		27.9	33.2
	3229.4	2559.9		98	169		21.3	20.9
	3741.3	2166		141	125		17.3	32.9
	3347.5	3071.8		160	103		6.6	18.7
	2599.2	3426.3		126	187		27.9	14.6
	2599.2	669.5		120	148		16.1	26.8
	5001.6	2953.7		108	116		23.1	26.8
	1890.4	2087.3		154	109		22.6	30.5
	1299.6	4883.4		87	151		20.9	40.2
	2362.9	4804.7		89	127		22.5	27.5
	2993.1	2166		115	103		20	32.3
	2678	2166		149	98		17.2	21.7
	1299.6	6419.3		162	199		26.8	36
	2914.3	3544.4		130	97		30.9	32.2
	1142.1	3426.3		96	111		15.9	21.2
	2166	3623.2		106	184		19.5	22.6
	2874.9	3741.3		145	166		16.7	16
	2678	3071.8		123	158		16.1	20.2
	2126.6	2599.2		124	179		16.1	24.4
	1457.1	3032.4		140	136		24.1	20.7
	2047.9	2874.9		95	150		15.9	31
	2402.3	4489.6		112	149		23.9	25.4
	2678	3505		132	143		21.4	25.7
	2796.2	2756.8		180	126		17.7	30.5
	2559.9	1181.5		201	150		17.8	24.3
	2047.9	3780.7		110	128		26.5	20
	2244.8	2284.2		167	164		22.8	29
	2362.9	2402.3		98	73		33.7	21.3
	2323.6	2441.7		177	144		19.7	27.1
	2087.3	3701.9		133	120		20.7	32.5
	3662.6	2796.2		157	148		26.3	18.7
	4765.3	2205.4		147	145		33.5	26.6
	2559.9	2756.8		141	136		24.4	30
	4883.4	3347.5		132	133		14.2	29.9
	2362.9	2914.3		176	153		18.6	38.5
	2244.8	1890.4		123	178		22.2	26.1
	2717.4	2599.2		158	133		39.7	26.5
	4213.9	1890.4		87	155		23.6	23.8
	2874.9	5907.4		160	118		13.1	27.6
	3859.5	1969.1		141	167		18	22.6
	2756.8	3623.2		124	189		13.1	18.6
	5316.6	2481.1		143	134		13	22.5
	4332.1	6340.6		132	122		12.6	32.9
	4410.8	1890.4		123	141		27.1	15.1
	3544.4	2559.9		116	152		21.5	29.1
	3544.4	1575.3		149	129		19.7	29.2
	4844	2717.4		98	116		27.5	33.1
	3386.9	4292.7		159	113		31.2	19.8
	2835.5	2047.9		150	125		16.9	19.1
	3583.8	3741.3		152	109		15.9	16.7
	2914.3	1811.6		130	103		12	25
	3111.2	1929.7		168	141		26.8	23.4
	2559.9	1457.1		144	148		17.2	21.8
	2599.2	1378.4		113	138		18.9	16.1
	2481.1	5395.4		120	110		9.5	19.8
	2323.6	3071.8		143	65		14.6	27.5
	4529	4017		120	162		18.9	52.7
	2481.1	1023.9		116	202		20.7	25.1
	2323.6	3386.9		134	194		31.8	18.5
	3111.2	4017		103	127		16.9	18.4
	3583.8	3544.4		166	67		23.9	14.8
	4213.9	4213.9		110	146		21.3	20.6
	2323.6	2008.5		174	124		19.8	8.9
	2126.6	2953.7		142	141		19.5	11.8
	3071.8	1417.8		140	158		31	30.5
	3465.7	5592.3		171	154		22.5	34.1
	4135.2	5198.5		120	211		24.4	15.4
	3977.6	7088.8		145	193		28	16.7
	2481.1	2481.1		94	87		22	13.2
	3150.6	4017		100	116		24.3	15
	1496.5	4844		138	159		13.2	14.3
	4765.3	2599.2		145	183		21.5	22.5
	2835.5	8900.4		109	147		27.2	12.6
	3386.9	4450.2		105	143		19.1	17.3
	4765.3	4686.5		139	106		22.8	18
	2796.2	4529		133	120		21.3	11.8
	4686.5	5710.4		123	164		15.9	19.9
	2953.7	1929.7		108	147		21.5	18.4
	2087.3	1929.7		140	159		30.7	15.4
	3465.7	1496.5		113	106		22.8	15.9
	4883.4	1614.7		94	115		19.8	16
	512	2756.8		189	118		35	11.2
	2599.2	3229.4		166	115		18.7	24.9
	5356	3426.3		110	170		26.1	25.4
	1929.7	3347.5		109	124		26.3	35.6
	4647.1	4056.4		121	143		26.8	18
	1417.8	4410.8		179	112		29	20
	2638.6	3583.8		198	131		22.2	25
	2126.6	2402.3		135	127		31	22
	3938.2	2284.2		155	138		15.4	13.5
	2638.6	2008.5		163	145		15.1	22.5
	2520.5	3229.4		135	140		14.2	21.9
	3505	2441.7		188	97		22.5	32.4
	1457.1	2087.3		102	175		19.7	24.3
	4804.7	2717.4		149	136		10.7	17.2
	4017	3623.2		142	141		14.6	20.7
	6261.8	4529		98	133		24.4	30.2
	2441.7	5434.8		142	107		14.6	30.9
	4095.8	1811.6		146	102		21.3	17.8
	2638.6	3308.1		119	137		16.1	24.3
	4489.6	3741.3		123	140		18.9	23.7
	5316.6	2402.3		140	126		13.3	10.7
	3938.2	2481.1		117	134		18	20
	3898.9	3386.9		181	190		16.7	19.1
	1811.6	2244.8		124	130		13.2	23.1
	4371.4	2874.9		163	128		27.5	25.4
	1732.8	2756.8		144	117		24.4	29.7
	3820.1	3780.7		138	125		26.1	34.4
	2126.6	3150.6		149	117		15.9	30.5
	1260.2	3071.8		120	152		26.8	21.9
	2244.8	2166		131	135		21.7	23.6
	2717.4	3426.3		118	175		33.7	22.5
	1969.1	4253.3		135	144		20.9	30.4
	2402.3	3701.9		97	147		26.3	31.4
	4529	2323.6		131	114		16.9	32
	4017	2047.9		141	77		12.5	34.7
	3150.6	5237.9		168	99		21.5	16.7
	4450.2	4253.3		149	102		39.7	27.8
	2087.3	1457.1		163	140		18	31
	3820.1	2874.9		137	166		23.7	21.9
	2087.3	2756.8		120	174		28.1	16.7
	1732.8	2441.7		101	131		27.1	20.2
	3898.9	2599.2		178	206		25.3	19.8
	5159.1	4883.4		134	122		24.7	18.4
	1614.7	2559.9		147	160		13.6	15.9
	3229.4	1929.7		171	122		28.4	24.4
	2008.5	7482.7		142	104		14.8	19.8
	1102.7	1929.7		166	128		16.9	16.1
	1811.6	1929.7		164	114		26.8	30.2
	2205.4	2638.6		166	92		22.2	18.7
	1102.7	1772.2		138	107		18.7	18.4
	4410.8	3347.5		155	163		21.7	27.2
	4489.6	1969.1		229	143		20.9	13.8
	6379.9	2205.4		153	206		20.2	30
	2481.1	2481.1		121	162		33.2	14.6
	3386.9	2835.5		166	184		26.8	20.2
	2638.6	3859.5		176	163		26.6	13.2
	4213.9	5159.1		135	194		27.6	21.9
	3150.6	3347.5		148	133		23.4	21.3
	2874.9	2638.6		134	124		26.1	25
	4371.4	1142.1		141	124		19.7	21.2
	2559.9	2756.8		141	124		18.5	27.8
	2205.4	1969.1		89	175		34.9	21.4
	984.6	2284.2		169	122		16.1	26.5
	3898.9	2047.9		91	174		15.1	19.5
	2599.2	4056.4		127	139		22.5	29
	8782.3	2284.2		128	100		19.1	22
	4332.1	2559.9		186	90		18	27.2
	2402.3	1929.7		130	116		19.3	26.6
	4371.4	3820.1		96	168		20.7	25.4
	5277.2	2323.6		121	136		17.3	14.8
	4529	2323.6		148	160		20	14.3
	4056.4	2835.5		146	122		31.4	18.8
	5986.1	3741.3		137	97		28.1	25.3
	4017	3859.5		176	128		22.5	41.4
	2323.6	2599.2		116	141		36	24
	2126.6	4529		104	151		18.7	14.2
	5237.9	2402.3		130	131		34.8	29.4
	1378.4	3268.7		157	158		22.6	13.2
	3308.1	2756.8		119	159		22.5	20.9
	2362.9	4686.5		97	132		16.8	13.6
	1457.1	3701.9		107	160		26.5	27.6
	2244.8	2244.8		101	156		30.2	22
	3623.2	2993.1		108	188		16.6	26.3
	1654.1	3544.4		95	171		17.3	18.9
	6852.5	5789.2		194	171		22.6	19.7
	2481.1	2441.7		137	164		25.3	20.2
	4332.1	4804.7		101	124		26.4	30.2
	3741.3	6143.7		90	170		21.3	21.5
	2166	2087.3		151	111		16.1	17.3
	4844	3701.9		117	114		21.3	12.2
	3741.3	3898.9		157	152		12.2	9.4
	2205.4	4095.8		145	159		15.1	16.6
	7207	1772.2		63	192		30.5	18.8
	3229.4	4371.4		127	146		15.5	23.9
	2087.3	2756.8		140	154		27.9	19.5
	2441.7	1654.1		97	176		20	21.8
	2599.2	5001.6		146	194		25.4	14.8
	3268.7	4844		171	113		34.9	16.8
	3741.3	3662.6		138	92		43.1	15.1
	3898.9	3505		131	88		19.8	42.1
	2441.7	3780.7		188	103		25.3	28.9
	3386.9	5749.8		108	97		21.7	18.8
	5710.4	2559.9		135	114		23.1	18.9
	3386.9	4213.9		173	89		30.8	16.9
	3898.9	1890.4		177	159		35.5	18.7
	5828.6	4017		120	179		41.5	23.1
	3190	7600.8		142	141		32.7	12
	1890.4	4410.8		122	120		20.9	27
	2559.9	1299.6		85	118		32.3	16.4
	3544.4	2323.6		77	146		25.4	26.1
	3662.6	3938.2		106	119		18.4	13.3
	2835.5	1142.1		148	153		16	17.3
	6104.3	4489.6		139	133		24.9	21.2
	5513.5	905.8		145	159		30.2	35.6
	4489.6	4765.3		106	88		17.3	19.8
	3583.8	5198.5		98	168		8.9	28
	3465.7	3741.3		139	100		29.3	35.5
	2047.9	2638.6		109	144		18	10.9
	1929.7	4253.3		114	151		26.1	15
	2166	4253.3		117	123		44	16.9
	4962.2	2796.2		169	110		14.3	20.2
	5749.8	5631.7		142	150		18.4	13.2
	3465.7	2244.8		133	123		26.6	20.9
	2323.6	3662.6		119	151		11.2	15.1
	3938.2	2402.3		121	136		10.6	14.1
	3820.1	2599.2		93	100		18.5	24.4
	2481.1	2678		154	92		27.9	21.7
	3308.1	5040.9		144	123		14.6	22.6
	5749.8	6340.6		85	144		24.9	13.8
	5474.2	2205.4		114	138		10.6	23.1
	4213.9	1969.1		92	194		37.4	22.5
	1220.9	2087.3		116	100		14.1	23.4
	2756.8	4607.7		117	157		11.4	33.7
	2835.5	2166		137	130		23.1	22.5
	3111.2	2323.6		181	96		23.1	16.9
	3229.4	2008.5		197	80		29	21.3
	3505	1811.6		123	131		25.4	14.8
	3111.2	1614.7		172	123		14.8	23.4
	5316.6	2362.9		158	231		37.4	13.8
	4883.4	3583.8		141	145		23.9	13
	1181.5	2205.4		92	156		26.5	22.8
	1929.7	1890.4		148	136		23.4	20.7
	4410.8	2402.3		160	106		32	11.8
	4489.6	5868		196	126		22.2	21.2
	2874.9	1339		137	125		33.2	28.1
	4056.4	4174.5		98	142		11.4	14.8
	4450.2	2166		162	90		23.9	27
	5395.4	4450.2		189	134		15.4	43.8
	4332.1	2993.1		158	146		42.6	18
	3190	6261.8		76	121		7.1	21.5
	1811.6	3347.5		135	92		22	15.4
	6064.9	1772.2		149	114		25.1	26.8
	4883.4	1417.8		164	130		36.9	19.8
	3071.8	4292.7		140	177		29.6	29
	6183	2205.4		163	140		25.3	23.1
	3386.9	2481.1		173	117		25.1	31
	2717.4	2756.8		131	103		30.9	21.2
	3386.9	2323.6		142	150		22.2	24.3
	5986.1	1851		144	112		34.3	20.2
	3111.2	4529		121	145		10.9	20.2
	3308.1	2559.9		171	152		40.8	14.2
	4174.5	2796.2		123	152		23.4	10.9
	945.2	3898.9		99	240		39.7	15.5
	3268.7	2638.6		129	137		15.1	16.6
	2953.7	2638.6		95	100		17.2	12.6
	3268.7	4371.4		81	148		16.6	26.4
	3741.3	3308.1		159	89		18	20.7
	4056.4	3268.7		153	97		20.9	19.8
	4568.4	2993.1		146	111		36.8	13
	3623.2	2993.1		143	127		24.3	19.5
	2441.7	4607.7		132	123		19.5	14.8
	3386.9	5001.6		123	86		38.6	13.2
	3583.8	2087.3		111	125		17.8	15.9
	4883.4	1575.3		99	123		10.3	48.6
	1496.5	1929.7		117	111		14.6	23.1
	5395.4	8546		131	168		28.5	33.2
	4410.8	2244.8		105	131		27.2	15.9
	4332.1	3190		135	158		31.2	10.7
	4607.7	1969.1		208	142		21.3	12.6
	3544.4	5552.9		60	147		21.5	23.9
	2205.4	4647.1		112	130		23.6	14.2
	3662.6	2481.1		135	140		30.2	11.8
	3977.6	1851		127	100		28.1	16.6
	3386.9	3820.1		74	143		22.5	26.5
	5159.1	3465.7		136	81		10.6	19.7
	3071.8	2678		113	144		15.9	16.6
	1772.2	2678		94	148		26.5	17.8
	1457.1	2362.9		65	104		32.7	20.9
	4765.3	2953.7		109	101		28.4	36.9
	4922.8	2323.6		127	113		20.2	42.4
	2874.9	3701.9		110	72		25.4	25.1
	3741.3	3898.9		173	177		20.9	19.7
	4725.9	9924.4		185	122		12.5	14.1
	3820.1	4686.5		135	165		17.8	23.1
	3268.7	4804.7		115	117		16.4	18.8
	4568.4	1102.7		93	107		18.4	33.1
	1772.2	2717.4		89	138		33.5	27.1
	2008.5	1772.2		100	72		38.9	29.3
	5907.4	1851		158	108		42.6	24.1
	3662.6	2166		200	67		36.6	21.9
	1851	3662.6		142	98		32.2	28.6
	4489.6	2087.3		112	149		15.5	13.2
	4450.2	3662.6		91	133		24.9	22.8
	1929.7	1575.3		130	97		29.6	20.9
	1299.6	1339		111	136		53.5	24.9
	2362.9	2205.4		175	163		23.6	21.5
	2166	5040.9		117	99		22.5	25.1
	748.3	5159.1		89	89		24.4	17.2
	2087.3	2441.7		141	157		17.3	16.6
	4922.8	3111.2		177	116		16	19.8
	2520.5	2205.4		86	169		32.5	27.3
	1535.9	2559.9		114	138		33.7	19.8
	2638.6	2166		133	149		26.5	21.9
	2244.8	3071.8		98	92		21.4	30.5
	4056.4	3426.3		122	181		13.2	17.2
	984.6	669.5		198	150		21.8	15.9
	2284.2	2953.7		121	175		16.8	22
	3701.9	2087.3		146	199		12.2	12.2
	2008.5	4883.4		175	145		21.7	28.1
	3938.2	4804.7		184	153		25.6	18.5
	4489.6	2166		115	178		29.3	14.6
	748.3	2166		149	134		27.8	14.8
	4332.1	6419.3		143	105		24.9	21.2
	3938.2	3544.4		125	162		27.1	29.1
	4489.6	3426.3		83	210		24.3	17.8
	5395.4	3623.2		124	160		39.3	22.5
	2126.6	3741.3		151	127		19.7	20
	2166	3071.8		101	181		32.9	16.1
	2953.7	2599.2		122	160		35.5	36
	2481.1	3032.4		189	141		26.8	21.4
	4095.8	2874.9		214	125		25.7	25.4
	9806.2	4489.6		130	142		21.8	17.7
	2874.9	3505		101	171		20.2	20.2
	4292.7	2756.8		184	142		24	17.8
	2796.2	1181.5		102	119		18	21.3
	4844	3780.7		150	169		34.4	21.4
	5592.3	2284.2		103	150		20.2	19.1
	5316.6	2402.3		129	171		49.9	16.9
	5080.3	2441.7		148	132		13.5	25.6
	3977.6	3701.9		149	124		31	22.6
	6183	2796.2		122	112		25.1	11.9
	3977.6	2205.4		141	124		38.2	12.5
	1260.2	2756.8		94	140		21.2	25.4
	1851	3347.5		113	99		55.8	15.4
	2835.5	2914.3		100	142		21.2	13.5
	2284.2	1890.4		85	108		16.1	10.7
	2993.1	2599.2		136	127		7.7	21.2
	1890.4	1890.4		156	107		21.9	12.5
	3032.4	5907.4		69	84		22.8	14.2
	4647.1	1969.1		138	110		34.9	19.7
	3780.7	3623.2		123	125		38.5	14.8
	2717.4	2481.1		117	125		21.9	15.5
	3150.6	6340.6		194	126		26.8	13
	1811.6	1890.4		170	143		34.5	14.8
	2441.7	2559.9		154	115		9.5	19.7
	3150.6	1575.3		169	152		18.7	21.2
	2953.7	2717.4		130	101		45	31.2
	3347.5	4292.7		98	113		44.5	12.5
	4568.4	2047.9		143	137		18.4	12
	2678	3741.3		94	126		19.7	11.4
	3505	1811.6		77	157		40.3	13.8
	3190	1929.7		126	189		16.1	19.8
	2323.6	1457.1		153	124		19.8	10.9
	5552.9	1378.4		127	148		15.4	20.2
	1890.4	5395.4		174	120		16.1	18
	4607.7	3071.8		113	210		20.5	18.7
	2638.6	4017		87	147		29.1	15.9
	2402.3	1023.9		153	111		18.4	17.3
	4135.2	3386.9		161	148		15.4	41.2
	1614.7	4017		123	146		17.8	37.5
	4410.8	3544.4		200	149		54.6	18
	4686.5	4213.9		127	150		27.3	18.8
	2362.9	2008.5		147	154		35.6	12.2
	4135.2	2953.7		159	83		17.3	18.5
	4844	1417.8		129	118		12.2	17.2
	2481.1	5592.3		115	127		14.1	15.9
	2835.5	5198.5		96	104		31	15.5
	3859.5	7088.8		148	106		29.6	19.7
	4410.8	2481.1		126	79		35.5	13.8
	6498.1	4017		151	103		14.8	11.4
	4017	4844		136	78		27.1	13.8
	3308.1	2599.2		161	96		17.3	14.1
	1496.5	8900.4		119	114		14.2	39.7
	1890.4	4450.2		115	186		17.8	17.2
	2166	4686.5		140	118		30.4	19.7
	3465.7	4529		144	119		35.6	11.9
	3741.3	5710.4		147	123		19.7	16.1
	1457.1	1929.7		125	82		26.3	24.3
	3898.9	1929.7		136	124		29.1	26.4
	4095.8	1496.5		167	121		11.8	13.2
	3386.9	1614.7		113	156		19.7	22.5
	2796.2	2756.8		116	119		14.6	14.1
	4686.5	3229.4		101	153		22	16.1
	2874.9	3426.3		113	109		22	17.2
	2087.3	3347.5		161	177		28	37
	2638.6	4056.4		188	127		16.1	28
	5395.4	4410.8		130	86		48.7	23.1
	1142.1	3583.8		171	117		20.7	16
	2402.3	2402.3		168	147		33.1	17.3
	3386.9	2284.2		139	200		23.1	23.1
	1969.1	2008.5		89	107		26.8	8.5
	2244.8	3229.4		167	116		39.8	19.8
	4095.8	2441.7		211	127		25.7	34.7
	3150.6	2087.3		118	92		15.9	31.4
	2559.9	2717.4		118	103		23.7	23.6
	5592.3	3623.2		140	131		20.7	38.9
	3190	4529		162	129		22.8	21.2
	2796.2	5434.8		116	102		19.8	25.4
	5907.4	1811.6		139	74		29.1	13.2
	5001.6	3308.1		172	171		44	28.3
	3623.2	3741.3		139	119		33.1	25.3
	3229.4	2402.3		113	138		23.9	13.2
	5474.2	2481.1		177	128		16.6	23.6
	5159.1	3386.9		104	175		26.8	20.7
	3662.6	2244.8		180	87		22.5	15.4
	1890.4	2874.9		111	96		30.7	20.9
	2244.8	2756.8		95	83		44	26.8
	4292.7	3780.7		99	102		25.1	14.8
	4410.8	3150.6		136	132		16	22.8
	3268.7	3071.8		60	129		22.5	38.9
	2914.3	2166		83	113		31.8	8.5
	4135.2	3426.3		124	136		27.8	25.1
	3505	4253.3		98	125		24.3	14.2
	2874.9	3701.9		186	123		37	16.1
	3347.5	2323.6		75	104		52.1	14.1
	4213.9	2047.9		102	157		17.3	24.4
	5474.2	5237.9		104	174		34.6	34.9
	6616.2	4253.3		132	102		28.9	13.2
	3741.3	1457.1		115	151		24.4	23.9
	3150.6	2874.9		72	167		16	22
	1929.7	2756.8		138	107		21.3	21.9
	8230.9	2441.7		115	83		19.1	26.5
	4095.8	2599.2		107	167		37.1	19.8
	3505	4883.4		131	128		31.4	29
	2126.6	2559.9		149	128		29.6	22.2
	3820.1	1929.7		110	152		34.9	9.4
	4371.4	7482.7		134	116		34.6	18.9
	1417.8	1929.7		84	139		32.2	13.2
	2047.9	1929.7		148	131		35.6	23.6
	5513.5	2638.6		152	115		29.1	19.9
	4804.7	1772.2		102	155		66.4	36.8
	2835.5	3347.5		124	104		22.5	51.5
	4410.8	1969.1		137	127		31.2	14.8
	5001.6	2205.4		158	124		43.8	22
	2441.7	2481.1		147	131		28.1	20.9
	4844	2835.5		176	134		34.5	23.1
	3662.6	3859.5		109	135		23.1	18.8
	5986.1	5159.1		84	103		40.2	19.7
	1929.7	3347.5		150	111		63.6	25.1
	2559.9	2638.6		141	140		22.8	24
	3544.4	1142.1		135	133		26.5	19.5
	3898.9	2756.8		97	131		20.7	16.7
	2087.3	1969.1		167	141		33.7	21.3
	5434.8	2284.2		125	115		44.9	45.7
	3386.9	2047.9		175	108		25.4	15.9
	4174.5	4056.4		136	141		26.5	24.6
	2284.2	2284.2		161	131		23.9	26.5
	3701.9	2559.9		149	178		34.3	25.1
	5749.8	1929.7		110	138		16.6	26.5
	4725.9	3820.1		117	141		27.3	34.3
	5552.9	2323.6		137	167		21.7	32.3
	4804.7	2323.6		114	115		26.1	31.4
	4332.1	2835.5		135	119		22.5	33.1
	1929.7	3741.3		119	122		27.8	29
	4056.4	3859.5		142	129		25.7	27.3
	4922.8	2599.2		138	99		47.4	15.1
	2441.7	4529		153	134		20.7	18.8
	1772.2	2402.3		130	184		14.1	19.9
	3662.6	3268.7		111	133		34.7	19.8
	4174.5	2756.8		143	136		20.5	12.6
	3229.4	4686.5		154	114		37.3	31.2
	3662.6	3701.9		137	116		25.1	43.7
	3938.2	2244.8		162	122		29.4	10.7
	5671.1	2993.1		133	119		27	13.5
	4647.1	3544.4		195	108		22.5	16.1
	3032.4	5789.2		110	175		23.1	19.7
	4332.1	2441.7		201	119		21.7	29.3
	3859.5	4804.7		157	138		30.5	32.7
	3780.7	6143.7		122	175		13.2	21.3
	4371.4	2087.3		129	154		25.3	12.6
	4292.7	3701.9		81	169		24.1	15.9
	6891.9	3898.9		127	129		21.2	60.9
	3426.3	4095.8		147	102		29.1	19.5
	4686.5	1772.2		120	103		31.8	18
	4725.9	4371.4		166	103		28.5	13.2
	2362.9	2756.8		167	151		45.2	18.5
	2835.5	1654.1		162	168		18	17.8
	3544.4	5001.6		119	197		16.6	22.5
	2638.6	4844		152	150		35.5	22.5
	2599.2	3662.6		127	132		28.6	13.2
	2205.4	3505		126	132		19.8	19.8
	3229.4	3780.7		118	110		43.3	17.7
	5080.3	5749.8		113	143		42.7	22.8
	4292.7	2559.9		164	141		25.1	11.3
	7246.4	4213.9		154	65		27.9	13.8
	1614.7	1890.4		158	124		18.8	14.6
	2008.5	4017		82	106		24.3	13.8
	3229.4	7600.8		141	135		53.4	21.5
	2835.5	4410.8		127	161		28.4	35.5
	4332.1	1299.6		114	80		30.7	19.7
	3190	2323.6		72	136		19.7	29
	4371.4	3938.2		174	133		32.7	10.6
	2914.3	1142.1		178	105		10.3	23.9
	3426.3	4489.6		139	177		27.3	10.1
	4017	905.8		151	146		45.2	18
	1929.7	4765.3		120	168		38.5	18.4
	6104.3	5198.5		151	127		36.3	33.4
	3505	3741.3		139	130		27.9	15.1
	3780.7	2638.6		116	155		30.4	9.4
	2362.9	4253.3		121	134		26.8	21.9
	3190	4253.3		83	156		25.3	22.2
	2520.5	2796.2		151	147		47.8	16.1
	3308.1	5631.7		147	138		15.1	12.5
	3544.4	2244.8		177	143		22.8	22.2
	2559.9	3662.6		166	91		32	21.3
	3386.9	2402.3		130	127		35.6	29.6
	3386.9	2599.2		124	144		24.4	22.5
	2953.7	2678		100	120		25.6	13.2
	2441.7	5040.9		151	180		27.8	16.1
	2678	6340.6		131	128		16.7	13.6
	2756.8	2205.4		80	162		36.8	16.7
	2520.5	1969.1		141	169		39.1	18.4
	2638.6	2087.3		104	123		17.3	27.1
	4017	4607.7		113	152		18.5	18.5
	4017	2166		211	129		27.3	30.2
	3701.9	2323.6		82	179		24.9	13.8
	5316.6	2008.5		142	148		26.5	11.4
	3544.4	1811.6		83	146		22	16.1
	1929.7	1614.7		156	98		36.1	17.8
	2362.9	2362.9		128	121		38.5	16.1
	4135.2	3583.8		129	127		25.4	14.1
	3465.7	2205.4		166	171		23.1	31.9
	3780.7	1890.4		111	138		28.3	20.7
	2087.3	2402.3		82	183		26.8	16.1
	2205.4	5868		100	114		32.9	29.6
	2599.2	1339		121	197		13.6	18.7
	7167.6	4174.5		121	108		21.5	16.1
	6576.9	2166		120	99		32.3	21.2
	5395.4	4450.2		126	113		18	15
	3938.2	2993.1		133	94		52.7	35.2
	1417.8	6261.8		121	108		29	35
	4450.2	3347.5		189	96		20.2	11.4
	1496.5	1772.2		144	97		35.6	19.1
	4253.3	1417.8		152	137		17.7	17.2
	4017	4292.7		123	90		14.6	17.8
	3820.1	2205.4		118	184		35.7	29.4
	2717.4	2481.1		129	127		17.7	26.8
	1063.3	2756.8		100	90		29.1	18.4
	5434.8	2323.6		159	147		34.9	20.5
	5119.7	1851		130	79		11.4	24.4
	2244.8	4529		207	126		22.5	28.1
	3308.1	2559.9		132	111		9.5	14.6
	1969.1	2796.2		128	105		22.5	29.1
	3701.9	3898.9		143	132		30.5	13.1
	6616.2	2638.6		181	159		42.7	27.3
	5592.3	2638.6		134	123		24	26.1
	2402.3	4371.4		100	129		14.6	20
	2559.9	3308.1		99	163		12.5	15.4
	4568.4	3268.7		170	95		19.7	18.9
	2756.8	2993.1		149	159		26.5	18.8
	2166	2993.1		125	152		19.1	38.5
	3347.5	4607.7		142	169		39.3	24.3
	2481.1	5001.6		177	150		22.6	21.5
	2559.9	2087.3		159	128		26.6	21.5
	2047.9	1575.3		194	112		27	26.1
	3229.4	1929.7		177	118		29.2	33.1
	3386.9	8546		123	100		26.1	18
	3190	2244.8		104	160		23.7	41.3
	4135.2	3190		102	124		25.7	26.3
	4213.9	1969.1		226	153		24.3	18.5
	4135.2	5552.9		123	132		45	21.3
	5119.7	4647.1		79	127		18.5	18.9
	2599.2	4804.7		107	108		23.9	21.8
	4135.2	2599.2		177	78		24.4	30.5
	3820.1	2166		154	174		35.7	14.2
	2559.9	4213.9		126	106		17.2	20.9
	2835.5	2402.3		176	86		11.4	15.4
	4922.8	3544.4		219	165		10.9	13.3
	2874.9	3032.4		129	134		28.6	19.8
	4607.7	2796.2		181	127		20.9	13.6
	827	1220.9		89	137		30.9	20.2
	3229.4	2008.5		134	156		42.4	22.6
	2362.9	2993.1		149	123		36.6	26.8
	3701.9	2796.2		150	174		49	33.9
	3741.3	4450.2		112	152		29.6	17.2
	3268.7	7679.6		111	136		23.4	23.1
	4332.1	3583.8		148	103		21.2	13.6
	7128.2	2874.9		139	106		44.5	19.3
	1693.4	3544.4		97	142		17.7	19.7
	5356	3780.7		152	115		27.1	14.2
	2441.7	2362.9		143	146		24.9	11.9
	4804.7	1732.8		216	133		15.9	27.3
	5277.2	3780.7		157	110		28.3	23.4
	5907.4	7010.1		124	117		19.8	17.8
	4922.8	3583.8		195	105		44.5	15.9
	3426.3	2835.5		149	83		23.8	19.8
	3386.9	6931.3		153	114		38.6	16.1
	1299.6	3780.7		132	147		30.2	20.5
	2756.8	2993.1		101	111		37.4	20.2
	2362.9	2835.5		143	146		45.9	15.9
	3071.8	6183		146	202		25.4	18
	4371.4	3701.9		156	103		26.5	20.9
	3111.2	3465.7		110	59		31	15.1
	6143.7	3701.9		75	112		21.3	22.2
	6104.3	5040.9		134	98		30.5	35
	5080.3	3820.1		124	166		16	28.6
	3505	3308.1		164	107		20.7	20.2
	6183	3032.4		115	134		31.8	20.7
	669.5	1772.2		173	156		14.8	27.3
	3465.7	5592.3		147	102		36.4	12.6
	6537.5	2323.6		154	114		31	20.2
	3426.3	3741.3		80	101		26.6	28.3
	5434.8	3071.8		78	163		36.1	26.3
	3426.3	2520.5		93	146		25.6	26.8
	8191.5	3032.4		156	169		10.1	36.8
	1023.9	2087.3		174	164		32.7	26.8
	3032.4	2205.4		111	125		20.9	22
	1102.7	3623.2		118	143		25.7	18.4
	5474.2	3583.8		188	144		17.7	25
	1457.1	2599.2		123	163		32	17.8
	4017	3701.9		110	152		12.2	33.7
	3229.4	4095.8		115	136		23.4	37.8
	1535.9	3347.5		124	110		18.5	20.7
	5907.4	3032.4		153	129		28.5	20.2
	5356	2481.1		82	97		43.7	25.7
	5316.6	5434.8		110	202		19.7	19.1
	3268.7	2638.6		113	74		11.9	23.9
	3347.5	2874.9		72	158		29.9	27.3
	3662.6	3426.3		120	147		27.8	13.6
	3071.8	4922.8		134	167		40.3	27.2
	4607.7	5828.6		95	140		36.4	24.3
	4529	6025.5		121	110		28.6	15.5
	4686.5	3701.9		99	114		40.8	17.3
	3071.8	3544.4		90	79		21.2	29.7
	4568.4	4647.1		143	105		11.8	24.7
	3820.1	5001.6		158	125		28.6	12.2
	7049.5	2008.5		127	114		38.9	18.5
	3465.7	2835.5		146	118		23.1	16.1
	4450.2	2874.9		154	123		23.1	24.9
	2520.5	2678		119	96		25.4	16.8
	1535.9	2126.6		124	135		25.7	15.1
	3150.6	1851		135	114		18.8	20.9
	3741.3	4017		171	88		13.2	25.6
	4568.4	4174.5		115	122		10.7	22.2
	2166	5080.3		203	204		46.9	27.1
	6616.2	4371.4		96	106		24.3	22.5
	3505	2520.5		127	73		38.5	27.9
	3268.7	4371.4		136	143		21.2	24.9
	4292.7	2993.1		114	180		30.5	11.3
	4135.2	5868		100	100		25	30.2
	6143.7	4017		146	88		22.5	20.7
	2599.2	3386.9		102	191		26.3	28
	3938.2	3583.8		116	121		18.7	12.6
	2953.7	708.9		186	134		48	19.5
	4056.4	1535.9		75	145		24.3	20.9
	2166	1614.7		143	91		22.8	7.7
	5198.5	2559.9		148	97		23.6	39.3
	3662.6	4135.2		102	125		43.8	15.1
	1890.4	3623.2		147	128		12	24.6
	2481.1	5513.5		140	80		18.9	16.1
	4332.1	3662.6		107	69		13.2	20.7
	2323.6	3071.8		129	138		26.1	15.9
	4844	4765.3		103	160		25.4	26.5
	4568.4	4253.3		131	110		20	22
	7758.3	1851		144	176		13.5	25.7
	7561.4	2756.8		133	91		14.8	18.7
	2953.7	1929.7		159	92		33.1	21.2
	4607.7	1851		128	83		52.2	19.9
	5001.6	1890.4		118	189		22.6	23.1
	3268.7	1260.2		93	173		27.3	11.3
	5198.5	2914.3		116	148		26.5	27.3
	5040.9	4135.2		135	130		33.1	21.5
	5789.2	4922.8		184	114		20.9	23.1
	2362.9	2205.4		133	141		28.3	15.4
	4095.8	6498.1		146	130		28.1	10.7
	3544.4	3859.5		114	202		35.8	26
	2402.3	2402.3		138	149		36.9	34.7
	6537.5	3386.9		98	172		22	17.2
	3190	3347.5		181	146		27.6	16.9
	4647.1	3071.8		160	64		44	19.8
	3111.2	2953.7		142	118		22.5	12.2
	2441.7	1811.6		128	165		28.6	22.5
	7640.2	4804.7		155	181		13.2	14.8
	5946.7	5119.7		103	177		23.1	26.6
	2559.9	4056.4		112	154		29
	4135.2	2559.9		143	121		30.5
	3071.8	2993.1		136	197		18.7
	1102.7	2481.1		153	133		26.8
	2993.1	3347.5		80	110		26.8
	5749.8	3505		198	131		20.2
	2323.6	1654.1		144	181		16.8
	2047.9	2796.2		116	150		25.1
	2205.4	2441.7		112	156		17.2
	5237.9	4922.8		151	129		17.8
	2874.9	2284.2		124	176		18.4
	4804.7	3308.1		187	127		36.3
	4804.7	4056.4		116	113		20.7
	3859.5	2993.1		98	139		30.2
	4135.2	1732.8		136	144		15.1
	4213.9	2874.9		158	109		21.7
	3820.1	3859.5		124	159		16.1
	4371.4	4174.5		127	98		27.3
	3741.3	4056.4		183	135		40.3
	5001.6	2323.6		95	192		17.4
	3426.3	2481.1		107	146		31.8
	2638.6	4371.4		88	138		40
	3741.3	3347.5		178	73		22.5
	4174.5	669.5		113	139		20.7
	3583.8	2362.9		123	106		13.8
	1220.9	3741.3		119	138		26.8
	3032.4	4725.9		99	99		12
	2835.5	2599.2		168	152		34.3
	3426.3	4253.3		123	138		27.1
	5395.4	3544.4		88	160		32.9
	3229.4	1811.6		106	138		18.5
	6773.8	1457.1		175	172		13.3
	2126.6	4804.7		113	90		31.1
	4489.6	1811.6		125	106		46.8
	1496.5	3386.9		176	168		23.4
	2205.4	5395.4		189	123		12.2
	2481.1	2756.8		162	156		25.4
	3701.9	3465.7		88	88		25.1
	3544.4	1811.6		110	113		25.1
	2717.4	2008.5		132	146		23.9
	4686.5	2008.5		166	134		37.7
	3583.8	2993.1		128	93		34.3
	4725.9	3386.9		93	140		32
	4765.3	4607.7		135	118		29
	4883.4	3268.7		167	107		14.1
	5277.2	3977.6		144	153		28.9
	3426.3	1614.7		181	150		30.5
	5237.9	1732.8		171	117		23.6
	5316.6	1614.7		173	100		34.4
	5513.5	2638.6		175	115		21.2
	3268.7	3229.4		161	79		28.6
	4332.1	2559.9		102	83		31.4
	6498.1	1732.8		166	89		36.7
	3229.4	1890.4		179	170		63.9
	2756.8	4174.5		111	142		27.2
	5631.7	4332.1		149	124		26.1
	3505	2796.2		168	58		28.3
	4213.9	2362.9		172	151		46.2
	5513.5	3977.6		119	129		27.8
	4765.3	4056.4		107	174		27.6
	5474.2	4607.7		140	200		21.7
	4056.4	5356		124	80		29.1
	4844	5789.2		117	126		39.6
	4410.8	3111.2		130	123		17.8
	4647.1	1693.4		166	124		17.2
	1693.4	1063.3		109	91		23.1
	3426.3	2244.8		168	150		36.7
	3347.5	2914.3		137	103		34.9
	3741.3	3347.5		151	99		16.1
	3741.3	1535.9		109	130		17.8
	7364.5	2126.6		119	87		32
	3032.4	3071.8		155	136		26.1
	3977.6	3032.4		86	185		31.8
	4174.5	1063.3		141	138		32.7
	2323.6	2599.2		142	104		31.9
	1929.7	4568.4		144	152		30.9
	5592.3	4332.1		175	83		29
	3741.3	2087.3		126	164		15.5
	5631.7	1693.4		103	114		25.4
	4095.8	3190		132	126		23.9
	3820.1	3347.5		150	99		31.2
		3741.3		185	151		14.8
		3111.2		179	174		20.7
		3190		103	156		18
		2520.5		118	89		29
		2362.9		120	113		37.9
		2087.3		129	92		25.7
		4725.9		125	148		25
		2559.9		150	133		25.4
		2678		61	61		22.6
		2205.4		141	107		24.1
		1575.3		130	97		16.7
		2008.5		177	176		24
		3544.4		143	127		32.7
		2874.9		106	163		18.9
		8664.1		132	83		19.7
		2520.5		126	115		22.5
		4489.6		108	126		33.7
		3977.6		136	87		17.2
		5001.6			100		26.5
		1535.9			122		33.7
		2953.7			112		25.1
		4883.4			112		36.6
		3465.7			159		28.1
		4213.9			124		24.1
		4529			118		33.7
		2323.6			90		16.1
		2481.1			235		36.1
		3820.1			94		36.7
		2520.5			186		36.6
		1929.7			152		34.3
		2953.7			152		36
		2717.4			146		37
		4292.7			103		16.7
		3544.4			120		18.6
		2678			147		32.2
		5198.5			130		17.2
		2441.7			100		27.9
		1969.1			96		31.6
		4410.8			91		22.5
		945.2			113		16.7
		2481.1			153		31.8
		1772.2			227		16.1
		1772.2			109		10.7
		2244.8			151		27.8
		2599.2			97		30.5
		4095.8			177		28.6
		6498.1			159		17.8
		3780.7			158		22.2
		1929.7			113		22.5
		3583.8			122		28.1
		5552.9			157		27.8
		2205.4			125		25
		2481.1			151		23.1
		2087.3			127		43.2
		4962.2			172		17.8
		2835.5			171		27.3
		4607.7			156		26.4
		8782.3			144		16.1
		5198.5			136		29.7
		4253.3			120		25.4
		3190			127		23.4
		1260.2			119		25
		4135.2			133		29
		2953.7			108		32.7
		4410.8			180		23.1
		3465.7			151		32
		3426.3			105		21.2
		1299.6			143		16
		3071.8			178		28.6
		2796.2			106		19.8
		1732.8			99		23.4
		2914.3			102		35.7
		2914.3			153		14.3
		1496.5			138		16.1
		1535.9			146		22.5
		3741.3			160		21.2
		3741.3			104		35.7
		2402.3			83		24.4
		1772.2			112		12.5
		1890.4			87		42.7
		3544.4			174		20.5
		3308.1			96		38.4
		4529			138		26.6
		1969.1			104		21.8
		2362.9			122		23.6
		1339			149		22
		1614.7			150		27.1
		3268.7			130		40.2
		2835.5			158		33.2
		4253.3			108		36.3
		1496.5			169		61.5
		2362.9			143		14.1
		2402.3			119		46.3
		787.6			184		23.7
		1063.3			172		25.2
		1969.1			166		36.5
		2402.3			134		13.1
		3820.1			71		11.2
		3150.6			156		18
		3780.7			189
		984.6			141
		2559.9			163
		3071.8			138
		3268.7			147
		2441.7			184
		3583.8			146
		3741.3			189
		1457.1			168
		2126.6			136
		4017			86
		2993.1			2314.57
		4174.5			710.775
		2756.8			1366.88
		1417.8			2259.9
		2835.5			1603.8
		4253.3			1950.08
		1535.9			2095.88
		3150.6			1075.28
		3938.2			1148.17
		1614.7			1767.83
		3111.2			1166.4
		1654.1			893.025
		5513.5			1366.88
		1417.8			1257.53
		3465.7			1986.53
		2599.2			1640.25
		3859.5			1239.3
		3426.3			2405.7
		3111.2			1129.95
		3386.9			911.25
		1969.1			2041.2
		1890.4			437.4
		1142.1			1148.17
		4765.3			820.125
		3662.6			820.125
		2362.9			1038.83
		1614.7			1202.85
		2441.7			1895.4
		2678			3007.12
		3977.6			1749.6
		3229.4			893.025
		2599.2			1658.47
		4135.2			2569.72
		2520.5			1020.6
		3977.6			1148.17
		2874.9			965.925
		4174.5			2296.35
		1811.6			1312.2
		4568.4			2132.32
		2441.7			4064.18
		3583.8			2405.7
		2441.7			1968.3
		2717.4			1476.22
		2362.9			583.2
		4292.7			1913.62
		1890.4			1366.88
		2520.5			2041.2
		3268.7			1603.8
		2756.8			1585.58
		2047.9			601.425
		2323.6			1421.55
		3977.6			1293.97
		2678			838.35
		2126.6			1786.05
		1417.8			1931.85
		2008.5			1038.83
		4017			1458
		3308.1			1403.33
		5080.3			2114.1
		2323.6			1858.95
		4213.9			2296.35
		3662.6			1239.3
		2205.4			2095.88
		2362.9			1020.6
		2914.3			2423.93
		2126.6			1494.45
		1575.3			2205.22
		4174.5			1512.67
		2402.3			2114.1
		3386.9			1858.95
		2087.3			1293.97
		1851			1512.67
		2756.8			1275.75
		2796.2			1184.62
		2481.1			1148.17
		2126.6			1202.85
		1260.2			1166.4
		3426.3			1002.38
		3465.7			1166.4
		3308.1			1622.03
		3150.6			2187
		2362.9			1348.65
		3662.6			1986.53
		4332.1			1658.47
		2559.9			2442.15
		3111.2			656.1
		2796.2			546.75
		3032.4			1439.78
		3662.6			1275.75
		3150.6			1330.42
		2756.8			3007.12
		3268.7			965.925
		2678			2551.5
		3465.7			1749.6
		2914.3			1494.45
		3190			492.075
		2559.9			1585.58
		2914.3			1494.45
		3544.4			1166.4
		2835.5			2405.7
		2756.8			2168.78
		2166			1148.17
		1575.3			1348.65
		5434.8			2332.8
		3977.6			583.2
		3111.2			1439.78
		2047.9			1840.72
		3308.1			1330.42
		2678			856.575
		2953.7			2405.7
		1969.1			473.85
		4135.2			692.55
		3229.4			2697.3
		1969.1			1239.3
		3190			1421.55
		4844			874.8
		2362.9			1312.2
		2205.4			2132.32
		3150.6			1968.3
		2559.9			492.075
		3426.3			947.7
		3268.7			1676.7
		4607.7			1148.17
		3150.6			2660.85
		3150.6			1622.03
		6183			2114.1
		2244.8			3043.57
		2047.9			1530.9
		2559.9			2314.57
		3820.1			1931.85
		3465.7			765.45
		3229.4			1439.78
		3268.7			1075.28
		2796.2			1221.08
		1851			984.15
		6931.3			1093.5
		4135.2			473.85
		2835.5			1129.95
		3308.1			2624.4
		2835.5			3189.38
		4174.5			2150.55
		2599.2			1549.12
		4962.2			1057.05
		3465.7			2114.1
		3741.3			1348.65
		3583.8			874.8
		1614.7			1950.08
		3426.3			1713.15
		1575.3			546.75
		3229.4			3244.05
		3229.4			1731.38
		3544.4			2533.28
		1732.8			2332.8
		2756.8			3389.85
		1693.4			1877.17
		2047.9			2460.38
		2953.7			2278.12
		2559.9			2278.12
		2874.9			1002.38
		2481.1			2533.28
		3977.6			2751.97
		2756.8			1530.9
		3938.2			3298.72
		2520.5			3098.25
		1260.2			3408.07
		2835.5			1767.83
		1339			2314.57
		2441.7			674.325
		3268.7			1968.3
		3741.3			3207.6
		2756.8			710.775
		3386.9			1458
		3859.5			2314.57
		2953.7			1658.47
		4135.2			3499.2
		2520.5			1111.72
		2047.9			2095.88
		3111.2			1913.62
		3898.9			1530.9
		1339			801.9
		1142.1			1458
		4213.9			1330.42
		2717.4			1931.85
		1851			838.35
		3347.5			2114.1
		2087.3			1129.95
		4844			1658.47
		2047.9			1129.95
		3268.7			1257.53
		2678			1093.5
		4844			1986.53
		5592.3			874.8
		4135.2			1166.4
		2047.9			1512.67
		4174.5			1275.75
		5080.3			947.7
		3268.7			1075.28
		3347.5			1840.72
		8861			1239.3
		1851			984.15
		6852.5			656.1
		2402.3			929.475
		3977.6			1858.95
		4489.6			1530.9
		4686.5			2351.03
		2244.8			1075.28
		4056.4			1950.08
		3701.9			1694.92
		5986.1			1020.6
		4410.8			1093.5
					1348.65
					984.15
					729
					1931.85
					1111.72
					1567.35
					965.925
					856.575
					1275.75
					1293.97
					1148.17
					984.15
					583.2
					1585.58
					1603.8
					1530.9
					1458
					1093.5
					1694.92
					2004.75
					1184.62
					1439.78
					1293.97
					1403.33
					1694.92
					1458
					1275.75
					1512.67
					1239.3
					1603.8
					1348.65
					1476.22
					1184.62
					1348.65
					1640.25
					1312.2
					1275.75
					1002.38
					729
					2515.05
					1840.72
					1439.78
					947.7
					1530.9
					1239.3
					1366.88
					911.25
					1913.62
					1494.45
					911.25
					1476.22
					2241.68
					1093.5
					1020.6
					1458
					1184.62
					1585.58
					1512.67
					2132.32
					1458
					1458
					2861.32
					1038.83
					947.7
					1184.62
					1767.83
					1603.8
					1494.45
					1512.67
					1293.97
					856.575
					3207.6
					1913.62
					1312.2
					1530.9
					1312.2
					1931.85
					1202.85
					2296.35
					1603.8
					1731.38
					1658.47
					747.225
					1585.58
					729
					1494.45
					1494.45
					1640.25
					801.9
					1275.75
					783.675
					947.7
					1366.88
					1184.62
					1330.42
					1148.17
					1840.72
					1275.75
					1822.5
					1166.4
					583.2
					1312.2
					619.65
					1129.95
					1512.67
					1731.38
					1275.75
					1567.35
					1786.05
					1366.88
					1913.62
					1166.4
					947.7
					1439.78
					1804.28
					619.65
					528.525
					1950.08
					1257.53
					856.575
					1549.12
					965.925
					2241.68
					947.7
					1512.67
					1239.3
					2241.68
					2587.95
					1913.62
					947.7
					1931.85
					2351.03
					1512.67
					1549.12
					4100.62
					856.575
					3171.15
					1111.72
					1840.72
					2077.65
					2168.78
					1038.83
					1877.17
					1713.15
					2770.2
					2041.2
