# Supplementary material for: Myopalladin knockout mice develop cardiac dilation and show a maladaptive response to mechanical pressure overload
Source: eLife. 2021 Sep 24;10:e58313. doi: 10.7554/eLife.58313 (PMC8547954; doi:10.7554/eLife.58313)
Supplement: Figure 2—source data 2. [file elife-58313-fig2-data2.xlsx]

## Sheet: Figure 2F
Figure 2–source data 2: BW/TL measurements in WT and MKO male mice.
F		WT 10W				MKO 10W
		BW (g)	TL (mm)	BW/TL (g/mm)		BW (g)	TL (mm)	BW/TL (g/mm)
		21.1	16.5	1.27879		20.2	16.71	1.20886
		21.7	17.15	1.26531		23.1	16.96	1.36203
		21.7	17.55	1.23647		21.8	17.68	1.23303
		24.1	17.375	1.38705		18.7	15.965	1.17131
		22.5	17.435	1.29051		19.2	16.86	1.13879
		21.7	17.1	1.26901		17	17.46	0.973654
		22.9	17.495	1.30895		20.1	16.65	1.20721
		23.6	16.91	1.39562		21.2	16.675	1.27136
		27.7	17.605	1.57342		17	16.18	1.05068
		24.9	17.84	1.39574		21.5	16.68	1.28897
		21.8	16.495	1.32161		19.2	16.7	1.1497
		22.3	16.835	1.32462		17.7	16.415	1.07828
		25	17.435	1.4339
	Average	23.1538	17.2096	1.34469		19.725	16.7446	1.17782
	SEM	0.517838	0.11712	0.025382		0.56369	0.137698	0.0313853
