# Supplementary material for: Myopalladin knockout mice develop cardiac dilation and show a maladaptive response to mechanical pressure overload
Source: eLife. 2021 Sep 24;10:e58313. doi: 10.7554/eLife.58313 (PMC8547954; doi:10.7554/eLife.58313)
Supplement: Figure 2—source data 3. [file elife-58313-fig2-data3.xlsx]

## Sheet: Figure 2I
Figure 2–source data 3: ICD fold amplitude measurements in WT and MKO male mice.
I		Average ICD fold amplitude (μm)
		WT	MKO
		0.45588	0.842427
		0.82664	0.767824
		0.570386	0.547879
		0.562729	0.496097
		0.490011	1.05067
		0.489934	0.544174
		0.246154	0.674844
		0.769244	0.456578
		0.368084	0.615135
		0.616908	0.6724
		0.466894	0.635149
			0.791421
			0.904261
			0.516489
	Average	0.532988	0.679667
	SEM	0.0499869	0.0461053
