# Supplementary material for: Myopalladin knockout mice develop cardiac dilation and show a maladaptive response to mechanical pressure overload
Source: eLife. 2021 Sep 24;10:e58313. doi: 10.7554/eLife.58313 (PMC8547954; doi:10.7554/eLife.58313)
Supplement: Figure 3—source data 3. [file elife-58313-fig3-data3.xlsx]

## Sheet: Figure 3J-L
Figure 3–Source data 3: HW/BW measurements on WT and MKO male mice under basal conditions.
J-L		WT 10W				MKO 10W
		BW (g)	HW (mg)	HW/BW (mg/g)		BW (g)	HW (mg)	HW/BW (mg/g)
		27.6	142	5.14493		23	120	5.21739
		24.4	137	5.61475		21.6	109	5.0463
		23.9	119	4.97908		22.9	110	4.80349
		25.6	134	5.23438		21.6	108	5
		24.1	120	4.97925		21.2	111	5.23585
		25.3	120	4.74308		20.3	121	5.96059
		23.9	117	4.8954		21.9	102	4.65753
		27.5	130	4.72727		22.5	121	5.37778
		24	129	5.375		20	113	5.65
		23.1	114	4.93506		19	115	6.05263
		21.5	113	5.25581		24.9	120.4	4.83534
		25.9	122	4.71042		24	122.6	5.10833
						22.6	115	5.0885
						23.3	133	5.70815
						23.3	127	5.45064
						23.4	115	4.91453
						21.9	102	4.65753
						24.1	127	5.26971
						21.1	100	4.73934
						21.1	103	4.88152
						21.1	102	4.83412
						25.2	141	5.59524
						22.5	123	5.46667
						23.7	120	5.06329
	Average	24.7333	124.75	5.04954		22.3417	115.875	5.19227
	SEM	0.506523	2.72231	0.0812191		0.314096	2.1487	0.0808004
		WT 4M				MKO 4M
		BW (g)	HW (mg)	HW/BW (mg/g)		BW (g)	HW (mg)	HW/BW (mg/g)
		27	123	4.55556		26.3	143	5.43726
		25.9	121	4.67181		25.1	133	5.2988
		29.9	182	6.08696		25.4	123	4.84252
		32.2	153	4.75155		24.6	122	4.95935
		28.6	134	4.68531		28.5	152	5.33333
		30.6	144	4.70588		27	136	5.03704
		30.4	133	4.375		26.3	138	5.24715
		30.1	151	5.01661		26.1	120	4.5977
		33.1	152	4.59215		23.7	117	4.93671
		26.7	120	4.49438		27	140	5.18519
		31.7	154	4.85804		28.7	171	5.95819
		27.2	125	4.59559		25.2	127	5.03968
		26.3	111	4.22053		23.4	122	5.21368
		29.2	131	4.4863		20.9	119	5.69378
		27.1	137	5.05535
		28.6	127	4.44056
		28.3	122	4.31095
	Average	28.9941	136.471	4.70015		25.5857	133.071	5.1986
	SEM	0.524297	4.27984	0.10262		0.55051	4.05114	0.0930306
		WT 6M				MKO 6M
		BW (g)	HW (mg)	HW/BW (mg/g)		BW (g)	HW (mg)	HW/BW (mg/g)
		31	191	6.16129		28	150	5.35714
		31	129	4.16129		27.8	139	5
		32	151	4.71875		28.3	143	5.053
		33	165	5		26.2	132	5.03817
		29	166	5.72414		26	134	5.15385
		29	132	4.55172		25	127	5.08
		27	139	5.14815		23.9	137	5.73222
		32	127	3.96875		29.6	136	4.59459
		34.4	196	5.69767		26.9	145	5.39033
		34.5	175	5.07246		26.3	146	5.55133
		31.2	156	5		27.7	149	5.37906
		33	159	4.81818
		30.5	148	4.85246
		34.2	151	4.4152
		34.1	180	5.27859
		25.3	127	5.01976
		32.3	165	5.10836
		33.6	133	3.95833
		32.6	155	4.7546
		34	142	4.17647
	Average	31.685	154.35	4.87931		26.8818	139.818	5.21179
	SEM	0.564441	4.61535	0.130309		0.487819	2.22718	0.0938561
