# Supplementary material for: Myopalladin knockout mice develop cardiac dilation and show a maladaptive response to mechanical pressure overload
Source: eLife. 2021 Sep 24;10:e58313. doi: 10.7554/eLife.58313 (PMC8547954; doi:10.7554/eLife.58313)
Supplement: Figure 3—source data 4. [file elife-58313-fig3-data4.xlsx]

## Sheet: Figure 3M, N
Figure 3–source data 4: Sarcomere-length tension relationship and calcium jump experiments in cardiac myofibrils from WT and MKO male mice.
M	WT					MKO
	SL (μm)	SEM SL	RT (nM mm-2)	SEM RT		SL (μm)	SEM SL	RT (nM mm-2)	SEM RT
	1.8	0.02	0	0		1.82	0.04	0	0
	1.91	0.02517	6.50371	1.00738		1.96	0.01	5.77	0.93
	2.05	0.01	7.46	1.01		2.06	0.01	9.12	2.35
	2.17	0.01	14.92	1.63		2.17	0.01	14.6	2.19
	2.25	0.01	15.2	2.23		2.23	0.01	25.1	2.57
	2.33	0.01	20.85	2.29		2.35	0.01	28.72	4.41
	2.47	0.01	24.7	2.24		2.45	0.01	43.92	3.97
	2.55	0.01	37.04	2.83		2.56	0.01	55.61	4.65
	SL, sarcomere length
	RT, Resting tension
N	P5.75/P4.50
	WT	MKO
	0.69	0.74
	0.7	0.7
	0.64	0.66
	0.74	0.71
	0.71	0.53
	0.7	0.73
	0.67	0.67
	0.66	0.65
	0.75	0.6
	0.78	0.76
		0.82
		0.66
