# Supplementary material for: Myopalladin knockout mice develop cardiac dilation and show a maladaptive response to mechanical pressure overload
Source: eLife. 2021 Sep 24;10:e58313. doi: 10.7554/eLife.58313 (PMC8547954; doi:10.7554/eLife.58313)
Supplement: Figure 4—source data 2. [file elife-58313-fig4-data2.xlsx]

## Sheet: Figure 4A-H
Figure 4–source data 2: Echocardiographic analyses on WT and MKO male mice subjected to TAC or SHAM.
A-H		WT basal 10W
		BW (g)	Age (wks)	HR (bpm)	LVIDd (mm)	LVIDs (mm)	IVSd (mm)	IVSs (mm)	LVPWd (mm)	LVPWs (mm)	FS (%)	EF (%)	RWT	CO (µl/min)
		25	9.9	620	3.31	1.96	0.79	1.08	0.75	1.19	40.7	72.7	0.4653	19.8
		26	9.9	627	3.26	1.97	0.79	1.15	0.88	1.19	39.6	71.5	0.5123	19.4
		25	9.9	626	3.13	1.73	0.78	1.13	0.79	1.26	44.8	77.5	0.5016	18.8
		27	9.7	610	3.15	1.92	0.76	1.08	0.75	1.14	38.8	70.6	0.4794	17.1
		29	9.7	641	3.37	2.02	0.74	1.11	0.78	1.21	40.2	72	0.451	21.2
		25	9.7	524	3.24	2.04	0.69	1.08	0.8	1.19	37	68.3	0.4599	15.2
		22	9.1	604	3.39	2.1	0.84	1.18	0.79	1.17	38	69.4	0.4808	19.9
		24	9	594	3.58	2.19	0.87	1.21	0.82	1.15	38.8	70.1	0.4721	22.6
		25	8.6	636	3.28	2.02	0.8	1.25	0.66	1.19	38.4	69.9	0.4451	19.7
		25	10.7	657	3.68	2.38	0.82	1.21	0.71	1.18	35.2	65.4	0.4158	24.3
		27	10.7	656	3.61	2.25	0.86	1.16	0.74	1.27	37.7	68.7	0.4432	24.9
		27	11.4	648	3.42	2.02	0.87	1.33	0.89	1.35	41.1	73	0.5146	22.7
		25	11.4	658	3.55	2.16	0.91	1.23	0.72	1.11	39.1	70.5	0.4592	24.3
		24	11.4	628	3.41	2.08	0.81	1.15	0.73	1.12	38.9	70.5	0.4516	21.4
		25	11.4	656	3.44	2.21	0.79	1.22	0.72	1.11	35.8	66.4	0.439	21
		27	9.9	631	3.03	1.8	0.7	1.08	0.71	1.22	40.5	72.8	0.4653	16.4
		24	9.9	644	3.33	1.91	0.74	1.19	0.77	1.2	42.6	74.9	0.4535	21.9
	Average	25.4118	10.1353	627.059	3.36353	2.04471	0.797647	1.16706	0.765294	1.19118	39.2471	70.8353	0.465276	20.6235
	SEM	0.393503	0.215219	7.93655	0.042994	0.0396596	0.0147411	0.0171662	0.0146055	0.0149234	0.571191	0.71414	0.00638203	0.67189
		MKO 10W basal
		BW (g)	Age (wks)	HR M-mode (bpm)	LVIDd (mm)	LVIDs (mm)	IVSd (mm)	IVSs (mm)	LVPWD (mm)	LVPWs (mm)	FS (%)	EF (%)	RWT	CO (µl/min)
		25	9.4	676	3.3	2	0.77	1.15	0.77	1.19	39.4	71.1	0.4667	21
		24	9.4	578	3.56	2.24	0.7	1.09	0.8	1.16	37.1	68	0.4213	20.8
		24	9.4	660	3.48	2.18	0.84	1.07	0.88	1.2	37.4	68.5	0.4943	22.4
		25	9.4	635	3.53	2.12	0.76	1.21	0.92	1.22	40	71.7	0.4759	23.5
		26	9.4	643	3.54	2.2	0.68	1.17	0.72	1.21	38	69.2	0.3955	23.1
		21	9.7	630	3.22	1.86	0.71	1.15	0.7	1.14	42.3	74.6	0.4379	19.5
		22	9.7	585	3.51	2.08	0.7	1.11	0.67	1.2	40.6	72.4	0.3903	21.6
		24	9.7	566	3.43	2.11	0.68	1.12	0.74	1.19	38.5	69.9	0.414	19.2
		24	9.7	565	3.3	1.95	0.72	1.1	0.62	1.18	40.8	72.9	0.4061	18.1
		22	9	540	3.55	2.26	0.85	1.21	0.79	1.08	36.4	67.2	0.462	18.9
		20	9	426	3.68	2.36	0.91	1.18	0.78	1.15	35.9	66.3	0.4592	16.2
		22	11.3	639	3.54	2.1	0.82	1.16	0.76	1.22	40.7	72.5	0.4463	24.3
		23	11.3	570	3.62	2.16	0.88	1.3	0.77	1.2	40.4	72	0.4558	22.8
		23	11.4	596	3.6	2.24	0.88	1.29	0.69	1.16	37.9	69	0.4361	22.6
		24	11.4	560	3.52	2.31	0.84	1.22	0.78	1.2	34.3	64.4	0.4602	18.5
		24	10.6	578	3.42	2.02	0.81	1.25	0.78	1.23	40.8	72.7	0.4649	20.2
		25	10.6	577	3.34	2.04	0.73	1.17	0.74	1.13	38.9	70.5	0.4401	18.5
		25	10.6	577	3.34	2.04	0.73	1.17	0.74	1.13	38.9	70.5	0.4401	18.5
		23	10.6	574	3.52	2.16	0.82	1.26	0.76	1.16	38.8	70.2	0.4489	20.7
	Average	23.4737	10.0842	588.158	3.47368	2.12789	0.780526	1.17789	0.758421	1.17632	38.7947	70.1895	0.442926	20.5474
	SEM	0.353499	0.193198	12.5547	0.0284102	0.0291154	0.0170906	0.0151711	0.0155647	0.00885921	0.459753	0.58644	0.00632492	0.503344
		WT TAC 1W
		BW (g)	Age (wks)	HR M-mode (bpm)	LVIDd (mm)	LVIDs (mm)	IVSd (mm)	IVSs (mm)	LVPWd (mm)	LVPWs (mm)	FS (%)	EF (%)	RWT	CO (µl/min)
		25	11	476	3.21	2.07	0.76	1.21	0.96	1.35	35.4	66.2	0.5358	12.9
		27	11	578	3.56	2.31	0.83	1.29	0.93	1.35	35.2	65.5	0.4944	20.2
		24	11	580	3.42	2.21	0.86	1.24	0.87	1.32	35.3	65.9	0.5058	18.6
		28	10.9	644	3.59	2.42	0.84	1.19	0.75	1.35	32.7	62.1	0.4429	21.9
		27	10.9	632	3.58	2.46	0.88	1.19	0.92	1.34	31.2	59.9	0.5028	20.2
		26	10.4	638	3.41	2.36	0.87	1.18	0.98	1.31	30.7	59.5	0.5425	17.9
		23	10.1	631	3.39	2.37	0.98	1.34	1.08	1.52	30.2	58.7	0.6077	17.7
		22	9.9	571	3.56	2.3	0.95	1.35	1.02	1.34	35.3	65.6	0.5534	20
		23	9.7	620	3.3	2.23	0.91	1.33	0.96	1.41	32.4	62	0.5667	16.7
		27	12	668	2.89	1.85	0.96	1.25	1.05	1.48	36	67.4	0.6955	14.7
		25	13.7	660	3.2	2.09	0.96	1.38	1.02	1.37	34.6	65.2	0.6188	17.8
		24	12	581	3.57	2.44	0.98	1.39	0.88	1.29	31.6	60.5	0.521	18.6
		27	11	541	3.25	2.2	0.94	1.17	1	1.28	32.4	62.1	0.5969	14.1
		26	11	565	3.16	2.02	0.79	1.21	0.88	1.33	36.1	67.2	0.5285	15.3
		24	11	528	3.48	2.33	0.9	1.11	0.89	1.41	33.1	62.8	0.5144	16.9
	Average	25.2	11.04	594.2	3.37133	2.244	0.894	1.25533	0.946	1.36333	33.48	63.3733	0.548473	17.5667
	SEM	0.454117	0.243639	13.472	0.0503134	0.0433569	0.0172253	0.0214552	0.0212038	0.0166444	0.507911	0.732331	0.0159254	0.651859
		MKO TAC 1W
		BW (g)	Age (wks)	HR M-mode (bpm)	LVIDd (mm)	LVIDs (mm)	IVSd (mm)	IVSs (mm)	LVPWD (mm)	LVPWs (mm)	FS (%)	EF (%)	RWT	CO (µl/min)
		25	10.6	542	3.89	2.59	0.87	1.22	0.9	1.19	33.3	62.6	0.455	22.2
		26	10.6	616	4.07	3.21	0.89	1.15	1.02	1.26	21	43.3	0.4693	19.7
		25	10.6	572	3.48	2.32	0.9	1.21	1.03	1.33	33.3	63.1	0.5546	18.3
		25	10.6	583	4.16	3.21	0.82	1.21	1.06	1.31	22.8	46.2	0.4519	21
		25	10.9	640	3.86	2.63	0.85	1.27	0.9	1.27	31.8	60.5	0.4534	25
		22	10.9	485	3.82	2.91	0.82	1.06	0.94	1.18	23.8	48.2	0.4607	14.6
		22	10.9	547	4.06	3.13	0.81	1.03	0.83	1.19	23	46.7	0.4039	18.6
		24	10.9	584	4.15	3.15	0.84	1.22	0.88	1.27	24	48.2	0.4145	21.6
		24	10.9	517	3.72	2.63	0.8	1.17	0.86	1.19	29.4	57.2	0.4462	17.6
		27	11	439	3.91	2.97	0.94	1.21	1.06	1.49	23.9	48.3	0.5115	14
		20	10.6	613	3.54	2.68	0.92	1.23	1.05	1.46	24.2	49.1	0.5565	15.9
		22	10.7	605	3.97	3.18	1.07	1.38	1.07	1.33	19.9	41.3	0.539	16.9
		23	12.3	544	4.05	2.91	0.98	1.38	0.9	1.38	28.3	55.2	0.4642	21.8
		24	12.6	644	3.8	2.83	0.96	1.36	0.93	1.31	25.5	51	0.4974	20.6
		23	12.6	520	3.68	2.51	1.04	1.39	0.9	1.25	31.9	60.8	0.5272	18.2
		24	12.6	555	3.76	2.63	0.91	1.28	0.92	1.37	30	58	0.4867	19.4
		23	13	651	3.83	2.74	0.88	1.46	1	1.42	28.4	55.6	0.4909	22.8
		23	13	494	3.91	2.84	0.94	1.39	1.08	1.48	27.3	53.8	0.5166	17.8
		25	11.5714	587	4.18	3.22	0.85	1.24	0.96	1.45	22.9	46.3	0.433	21.1
		26	11.5714	452	3.63	2.63	0.77	1.25	1.01	1.38	27.4	54.2	0.4904	13.6
		24	11.6	527	4.5	3.59	0.83	1.18	0.94	1.12	20.2	41.5	0.3933	20
	Average	23.9048	11.4306	557.952	3.90333	2.88143	0.89	1.2519	0.96381	1.31571	26.3	51.9571	0.476962	19.081
	SEM	0.357936	0.191666	13.2013	0.0523874	0.067631	0.0170992	0.0240695	0.0167542	0.0236298	0.921748	1.48498	0.0101942	0.65464
		WT TAC 2W
		BW (g)	Age (wks)	HR M-mode (bpm)	LVIDd (mm)	LVIDs (mm)	IVSd (mm)	IVSs (mm)	LVPWD (mm)	LVPWs (mm)	FS (%)	EF (%)	RWT	CO (µl/min)
		27	12	536	3.32	2.18	0.88	1.2	0.94	1.31	34.3	64.6	0.5482	15.5
		27	12	572	3.58	2.37	0.8	1.19	1.01	1.43	33.8	63.6	0.5056	19.4
		26	12	601	3.6	2.3	0.8	1.28	0.93	1.31	36.2	66.8	0.4806	21.6
		28	11.9	583	3.98	2.85	0.81	1.11	0.87	1.37	28.3	55.3	0.4221	22.2
		28	11.9	567	3.42	2.3	0.91	1.37	0.99	1.39	32.6	62.2	0.5556	17
		27	11.4	635	3.67	2.47	0.95	1.42	0.96	1.37	32.7	62	0.5204	22.2
		28	12	638	3.3	2.13	0.84	1.21	0.89	1.31	35.4	66.1	0.5242	18.5
		25	12	540	3.35	2.16	0.88	1.2	0.9	1.33	35.4	66.1	0.5313	16.2
	Average	27	11.9	584	3.5275	2.345	0.85875	1.2475	0.93625	1.3525	33.5875	63.3375	0.511	19.075
	SEM	0.377964	0.0731925	13.68	0.0813886	0.0827	0.0195884	0.0363392	0.0173141	0.0157831	0.883062	1.31338	0.01518	0.960794
		MKO TAC 2W
		BW (g)	Age (wks)	HR M-mode (bpm)	LVIDd (mm)	LVIDs (mm)	IVSd (mm)	IVSs (mm)	LVPWD (mm)	LVPWs (mm)	FS (%)	EF (%)	RWT	CO (µl/min)
		25	11.6	610	3.95	2.77	0.78	1.16	0.86	1.18	30	57.9	0.4152	23.8
		26	11.6	602	4.21	3.54	0.9	1.04	1.01	1.18	16.1	34.1	0.4537	16.3
		26	11.6	572	4.11	3.12	0.82	1.17	0.86	1.23	24.2	48.6	0.4088	20.6
		25	11.9	565	4	3.26	0.78	1.04	1.04	1.31	18.4	38.6	0.455	15.3
		26	11.9	594	4.02	2.78	0.85	1.3	0.94	1.27	30.9	59	0.4453	24.9
		21	11.9	624	4.12	3.2	0.8	1.11	0.92	1.17	22.4	45.5	0.4175	21.2
		22	11.9	521	4.68	3.94	0.82	1.23	0.9	1.17	16	33.7	0.3675	17.7
		24	11.9	580	4.4	3.7	0.78	1.06	1	1.27	15.8	33.6	0.4045	16.8
		23	11.9	565	3.99	3.14	0.86	1.2	0.88	1.22	21.4	44	0.4361	17.5
	Average	24.2222	11.8	581.444	4.16444	3.27222	0.821111	1.14556	0.934444	1.22222	21.6889	43.8889	0.422622	19.3444
	SEM	0.61864	0.05	10.2009	0.0792869	0.131295	0.0139885	0.0301897	0.0225531	0.0172222	1.93616	3.29758	0.0093907	1.14226
		WT TAC 4W
		BW (g)	Age (wks)	HR M-mode (bpm)	LVIDd (mm)	LVIDs (mm)	IVSd (mm)	IVSs (mm)	LVPWDd (mm)	LVPWs (mm)	FS (%)	EF (%)	RWT	CO (µl/min)
		27	13.9	550	3.7	2.48	0.81	1.25	0.93	1.36	32.8	62.2	0.4703	19.8
		29	13.9	629	3.99	2.81	0.83	1.21	0.98	1.31	29.6	57.1	0.4536	25.2
		27	13.9	577	3.58	2.44	0.83	1.27	0.85	1.34	31.8	60.8	0.4693	19
		31	14.9	569	3.89	2.85	0.9	1.27	1.01	1.35	26.6	52.7	0.491	19.3
		31	14.4	670	3.8	2.74	0.89	1.27	1.04	1.38	27.9	54.8	0.5079	22.8
		28	13.9	575	3.93	2.83	0.83	1.17	0.86	1.33	27.9	54.6	0.43	21.3
		27	13.9	486	3.75	2.7	0.84	1.32	1	1.37	28	54.9	0.4907	16
		28	13.9	534	3.37	2.29	0.94	1.25	0.92	1.37	32.1	61.5	0.5519	15.5
	Average	28.5	14.0875	573.75	3.75125	2.6425	0.85875	1.25125	0.94875	1.35125	29.5875	57.325	0.483088	19.8625
	SEM	0.597614	0.131526	19.9085	0.0716997	0.0744923	0.0160843	0.0158607	0.0248163	0.00833185	0.830971	1.29832	0.0130335	1.15108
		MKO TAC 4W
		BW (g)	Age (wks)	HR M-mode (bpm)	LVIDd (mm)	LVIDs (mm)	IVSd (mm)	IVSs (mm)	LVPWD (mm)	LVPWs (mm)	FS (%)	EF (%)	RWT	CO (µl/min)
		26	13.4	611	4.34	3.21	0.88	1.32	0.84	1	26	51.3	0.3963	26.9
		28	13.4	531	5.02	4.35	0.88	1.04	1	1.19	13.4	28.5	0.3745	18.1
		27	13.4	468	4.56	3.46	0.78	1.19	0.9	1.2	24	47.9	0.3684	21.5
		27	13.7	603	4.68	3.63	0.84	1.09	0.79	1.19	22.4	45.2	0.3483	27.7
		27	13.4	545	4.21	3.29	0.78	1.11	0.9	1.23	21.8	44.4	0.399	19.1
		23	14.9	590	4.37	3.68	0.87	1.21	0.98	1.31	15.8	33.5	0.4233	17.1
		26	14.9	553	5.02	4.28	0.69	1.1	1.02	1.46	14.8	31.3	0.3406	20.5
		26	14.8571	659	4.57	3.78	0.88	1.19	0.98	1.29	17.4	36.4	0.407	23.1
		27	14.5714	599	5.28	4.34	0.86	1.17	0.88	1.25	17.8	36.8	0.3295	29.4
		26	14.5714	497	5.11	4.4	0.88	1.08	0.96	1.25	13.9	29.5	0.3601	18.4
		28	14.5714	537	4.63	3.64	0.73	1.06	0.84	0.96	21.2	43.2	0.3391	23.1
	Average	26.4545	14.1519	563	4.70818	3.82364	0.824545	1.14182	0.917273	1.21182	18.9545	38.9091	0.371464	22.2636
	SEM	0.43275	0.214716	17.5071	0.110859	0.140408	0.0216501	0.0261082	0.0239203	0.0435848	1.36919	2.48453	0.00942441	1.26493
