# Supplementary material for: Myopalladin knockout mice develop cardiac dilation and show a maladaptive response to mechanical pressure overload
Source: eLife. 2021 Sep 24;10:e58313. doi: 10.7554/eLife.58313 (PMC8547954; doi:10.7554/eLife.58313)
Supplement: Figure 4—source data 3. [file elife-58313-fig4-data3.xlsx]

## Sheet: Figure 4J-L
Figure 4–source data 3: Measurements of HW/BW in WT and MKO male mice subjected to TAC or SHAM.
J-L		WT SHAM 4W				MKO SHAM 4W				WT TAC 4W				MKO TAC 4W
		BW (g)	HW (mg)	HW/BW (mg/g)		BW (g)	HW (mg)	HW/BW (mg/g)		BW (g)	HW (mg)	HW/BW (mg/g)		BW (g)	HW (mg)	HW/BW (mg/g)
		26.3	127	4.8289		23.5	114	4.85106		28.7	203	7.07317		26	237	9.11538
		25.2	128	5.08		25.4	123	4.84252		27.8	166	5.97122		26.9	209	7.76952
		24.4	121	4.95902		24.6	118	4.79675		30	196	6.53333		25.3	343	13.5573
		22.7	96	4.22907		24.9	138	5.54217		25.8	173	6.70543		23.2	155.1	6.68534
		27	123	4.55556		25.2	127	5.03968		26.2	170	6.48855		23.9	163.4	6.83682
		25.9	121	4.67181		23.4	122	5.21368		27.6	175	6.34058		23.4	175.7	7.50855
		27.2	125	4.59559		20.9	119	5.69378		27.8	195	7.01439		21.9	159.7	7.29224
		26.3	111	4.22053		25.1	133	5.2988		29.1	188	6.46048		23.5	169	7.19149
		29.2	131	4.4863		24.6	122	4.95935		30	193	6.43333		25.7	175	6.80934
		27.1	137	5.05535		25.4	123	4.84252		29.6	237	8.00676		27	263	9.74074
														25.6	210	8.20312
														25.4	210	8.26772
														26.2	176	6.71756
														21.3	187	8.77934
														25.3	281	11.1067
														24.3	177	7.28395
	Average	26.13	122	4.66821		24.3	123.9	5.10803		28.26	189.6	6.70272		24.6813	205.681	8.30407
	SEM	0.557783	3.61478	0.0985541		0.439949	2.25315	0.100545		0.470272	6.61681	0.176602		0.421626	12.9972	0.466174
