# Supplementary material for: Myopalladin knockout mice develop cardiac dilation and show a maladaptive response to mechanical pressure overload
Source: eLife. 2021 Sep 24;10:e58313. doi: 10.7554/eLife.58313 (PMC8547954; doi:10.7554/eLife.58313)
Supplement: Figure 5—source data 1. [file elife-58313-fig5-data1.xlsx]

## Sheet: Figure 5B
Figure 5–source data 1: Measurements of fibrotic area in the left ventricle of WT and MKO male mice 4 weeks after TAC or SHAM.
B		SHAM 4W - Fibrotic area (%)			TAC 4W - Fibrotic area (%)
		WT	MKO		WT	MKO
		0.598872	0.635057		1.00433	1.44594
		0.728228	0.589943		0.752182	1.29388
		0.647493	0.658365		0.79642	1.13837
	Average	0.658198	0.627788		0.850977	1.29273
	SEM	0.380011	0.362454		0.491312	0.74636
