# Supplementary material for: Myopalladin knockout mice develop cardiac dilation and show a maladaptive response to mechanical pressure overload
Source: eLife. 2021 Sep 24;10:e58313. doi: 10.7554/eLife.58313 (PMC8547954; doi:10.7554/eLife.58313)
Supplement: Figure 5—source data 3. [file elife-58313-fig5-data3.xlsx]

## Sheet: Figure 5G
Figure 5–source data 3. ICD fold amplitude measurements in WT and MKO male mice 4 weeks after TAC.
G		Average ICD fold amplitude (μm)
		WT	MKO
		0.672444	1.18227
		0.7008	1.10621
		0.514055	1.05016
		0.4	1.38332
		0.771104	1.37556
		0.425618	1.10771
		0.705882	0.761081
		0.417584	1.51376
		0.423482	0.971667
		0.64323	1.14797
		0.608	0.947319
		0.838194	1.05227
		0.412533	1.3136
		1.11146	0.501456
		0.44578	1.2261
		1.27834	1.43533
		0.613231	1.50105
		0.993035	0.722358
		0.776571
		0.71878
		0.5176
		0.607238
	Average	0.663408	1.12773
	SEM	0.0500171	0.0656246
