# Supplementary material for: Myopalladin knockout mice develop cardiac dilation and show a maladaptive response to mechanical pressure overload
Source: eLife. 2021 Sep 24;10:e58313. doi: 10.7554/eLife.58313 (PMC8547954; doi:10.7554/eLife.58313)
Supplement: Figure 6—source data 1. [file elife-58313-fig6-data1.xlsx]

## Sheet: Figure 6A, C
Figure 6–source data 1: qRT-PCR and densitometry analysis on WT and MKO male mice subjected to TAC or SHAM.
A-J	qRT-PCR analyses
	A		Mypn (fold change)			B	Palld (fold change)			C	Nppa (fold change)			D	Nppb (fold change)			E	Ankrd1 (fold change)			F	Acta1 (fold change)			G	Actc1 (fold change)			H	Myh6 (fold change)			I	Myh7 (fold change)			J	Casq2 (fold change)
		WT	Basal	TAC 4D	TAC 4W		Basal	TAC 4D	TAC 4W		Basal	TAC 4D	TAC 4W		Basal	TAC 4D	TAC 4W		Basal	TAC 4D	TAC 4W		Basal	TAC 4D	TAC 4W		Basal	TAC 4D	TAC 4W		Basal	TAC 4D	TAC 4W		Basal	TAC 4D	TAC 4W		Basal	TAC 4D	TAC 4W
			1.01	0.45	0.87		1.02	0.41	0.6		1.01	16.99	10.33		1.39	3.14	6.31		0.96	2.57	7.46		1.1	2.53	12.76		1.1	1.2	2.17		0.6	0.61	1.96		0.8	0.92	8.52		1.31	0.41	0.8
			0.86	0.55	1.03		0.85	0.61	0.93		0.76	25.32	5.52		0.81	5.23	4.64		0.84	3.35	4.03		0.39	2.7	5.18		0.9	0.94	1.17		1.3	0.91	2.11		1.2	1.38	5.15		1.18	0.57	0.89
			1.13	0.6	0.78		1.13	0.71	0.66		1.23	10.74	5.16		0.79	4.17	3.18		1.2	3.16	4.38		1.5	3.72	9.25			1.05	1.06		1.22	1.01	1.95			1.46	3.6		0.51	0.61	0.93
				0.81	1.34			0.81	1.11			24.11	9.08			6.4	4.17			4.72	4.84			3.84	14.21				1.93			1.6	3.45			3.3	4.94			0.7	1.13
				1.09	0.69			1.14	0.59			21.37	8.85			6.59	3.1			3.95	3.44			5.47	5.89				1.59			1.92	1.1			3.38	8.09			1.02	0.76
				0.47				0.43				7.53				4.29				2.31				5.25					0.98			0.71				2.69				0.38
				0.75				0.55				13.52				3.67				2.89				3.7								0.89				9.06				0.63
				0.45				0.39				18.2				5.17				2.22				3.42								0.88				3.56				0.41
		Average	1	17.22	7.79		1	17.22	7.79		1	17.22	7.79		1	4.83	4.28		1	3.14	4.83		1	3.83	9.46		1	17.22	7.79		1.04	1.07	2.11		1	17.22	7.79		1	17.22	7.79
		SEM	0.14	2.24	1.03		0.14	2.24	1.03		0.14	2.24	1.03		0.2	0.44	0.59		0.1	0.3	0.7		0.32	0.37	1.8		0.14	2.24	1.03		0.22	0.16	0.38		0.14	2.24	1.03		0.14	2.24	1.03
		MKO	Basal	TAC 4D	TAC 4W		Basal	TAC 4D	TAC 4W		Basal	TAC 4D	TAC 4W		Basal	TAC 4D	TAC 4W		Basal	TAC 4D	TAC 4W		Basal	TAC 4D	TAC 4W		Basal	TAC 4D	TAC 4W		Basal	TAC 4D	TAC 4W		Basal	TAC 4D	TAC 4W		Basal	TAC 4D	TAC 4W
			0	0.01	0.01		0.44	1.28	0.65		0.97	10.7	8.73		1.25	19.5	3.05		0.6	9.24	6.84		0.29	7.81	19.51		0.74	0.88	1.79		0.44	3.81	2.51		0.68	8.42	9.71		0.66	1.24	0.75
			0	0	0.01		1.1	0.98	1.12		1.36	20.8	23.35		0.64	6.51	7.29		1.3	6.64	12.21		0.37	6.87	30.23		1.17	0.6	1.45		1.16	1.1	3.49		1.13	4.28	13.93		1.26	0.89	1.38
			0	0	0		0.68	0.68	1.22		0.62	10.77	9.5		0.56	5.55	3.73		1.22	4.2	6.86		0.42	5.71	9.64			0.93	1.71		0.98	1.41	3.04			2.16	14.3		0.76	0.7	1.11
				0	0			1.14	0.61			21.51	26.43			13.92	5.42			6.99	8.08			8.24	5.52			1.63	2.45			2.47	1.9			4.16	4.31			1.14	0.55
				0	0			0.78	0.32			17.31	15.6			4.78	3.95			3.82	5.17			3.78	10.85			1.66	1.55			1.02	0.96			6.64	6.32			0.77	0.5
				0	0			0.95	0.62			11.07	22.76			7.75	5.81			4.43	8.35			4.4	11.02				1.93			2.5	1.8			4.85	16.01			0.71	0.78
				0	0			0.68	0.77			7.56	13.37			6.54	6.19			4.37	7.55			4.83	14.86				1.95			1.63	1.79			2.29	7.82			0.7	0.9
					0				0.14				8.02				8.08				5.7				12.74				1.44				2.05				6.94				0.68
		Average	0	0	0		0.74	0.93	0.68		0.98	14.25	15.97		0.82	9.22	5.44		1.04	5.67	7.59		0.36	5.95	14.3		0.96	1.14	1.78		0.86	1.99	2.19		0.91	4.69	9.92		0.89	0.88	0.83
		SEM	0	0	0		0.2	0.09	0.13		0.21	2.1	2.59		0.22	2.06	0.63		0.22	0	0.76		0.04	0.66	2.69		0.21	0.21	0.12		0.21	0.38	0.28		0.23	0.85	1.52		0.19	0.09	0.1
L-P	Densitometry of Western blots
	L		MYPN			M	ANKRD1			N	CASQ2			O	Desmoplakin			P	SORBS2/ArgBP2
		WT	Basal	TAC 4D	TAC 4W		Basal	TAC 4D	TAC 4W		Basal	TAC 4D	TAC 4W		Basal	TAC 4D	TAC 4W		Basal	TAC 4D	TAC 4W
			1.12	1.11	0.67		1.1	9.87	8.71		0.48	1.1	4.58		1.36	1.77	0.88		0.43	1.13	1
			0.97	1.21	0.52		0.58	10.5	13.69		0.49	0.88	5.96		1.08	0.6	0.96		0.81	1.29	1.24
			1.86	1.18	0.35		0.62	19.54	28.28		0.39	1.65	4.99		1.27	0.51	1.82		1.14	1.41	2.08
			1.45	1.12	0.6		1.32	8.74	9.67		1.36	3.21	2.89		0.97	0.53	0.98		1.07	1.93	3.83
			1.04	0.65	0.35		0.91	14.41	12.05		2.28	1.69	4.21		0.85	1.64	2.02		1.2	1.98	3.07
			0.69	0.67	1.03		1.54	13.04	28.66			1.91	1.99		0.48	2.1	0.54		1.16	3.12	2.68
			0.53	0.74			0.79					2.21				1.74			0.88	2.71	2.08
												1.2							1.32
												0.95
												2.18
		Average	1.09	0.95	0.59		1	12.68	16.84		1	1.7	4.1		1	1.27	1.2		1	1.94	2.28
		SEM	0.17	0.1	0.1		0.12	1.62	3.75		0.37	0.23	0.59		0.13	0.26	0.24		0.1	0.28	0.38
		MKO	Basal	TAC 4D	TAC 4W		Basal	TAC 4D	TAC 4W		Basal	TAC 4D	TAC 4W		Basal	TAC 4D	TAC 4W		Basal	TAC 4D	TAC 4W
			0	0	0		2.38	6.64	26.05		2.07	0.67	2.11		1.24	2.36	2.29		1.79	3.56	3.6
			0	0	0		1.83	10.75	18.12		2.16	0.58	3.18		0.93	6.28	2.02		1.5	4.45	5.12
			0	0	0		1.05	18.35	21.36		0.79	0.67	1.74		0.81	2.46	1.46		1.84	2.7	3.09
			0	0	0		0.66	17.93	21.25		0.62	1.71	2.05		1.07	2.35	1.82		2.2	4.09	5.58
			0	0	0		2.28	9.2	32.52		1.61	0.65	1.67		0.39	1.13	1.58		1.56	2.93	3.27
			0	0	0		4.89	8.25	14.52		1.03	0.41	2.3		1.48	2.83	2.61		1.7		2.88
			0	0	0		1.04		9.09		0.43	0.31	5.66		0.46		1.41		0.9		3.5
			0	0	0		1.04		20.65		0.91	0.33	5.24		1.64		1.16		1.03		2.16
									6.5			0.77					1.69
		Average	0	0	0		1.9	11.85	18.9		1.2	0.68	2.99		1	2.9	1.78		1.57	3.55	3.65
		SEM	0	0	0		0.48	2.06	2.69		0.23	0.14	0.56		0.16	0.72	0.15		0.15	0.33	0.4
