# Supplementary material for: Myopalladin knockout mice develop cardiac dilation and show a maladaptive response to mechanical pressure overload
Source: eLife. 2021 Sep 24;10:e58313. doi: 10.7554/eLife.58313 (PMC8547954; doi:10.7554/eLife.58313)
Supplement: Figure 7—source data 1. [file elife-58313-fig7-data1.xlsx]

## Sheet: Figure 7A, B, D
Figure 7–source data 1: Analysis of sarcomere shortening, Ca2+ transients, and Ca2+ sparks in CMCs from WT and MKO mice subjected to TAC or SHAM.
	Parameter		0.5 Hz				1 Hz				2 Hz
			WT SHAM	MKO SHAM	WT TAC	MKO TAC	WT SHAM	MKO SHAM	WT TAC	MKO TAC	WT SHAM	MKO SHAM	WT TAC	MKO TAC
A	Sarcomere shortening (%)	Average	5.544	6.148	6.693	7.752	5.024	6.457	6.687	6.767	5.4638	7.2195	6.767	6.311
		SEM	0.368	0.344	1.292	1.282	0.496	0.459	1.414	1.399	0.599	0.5943	1.399	1.356
B	Time to 90% peak (ms)	Average	109	116	143	148	105	110	136	134	100	104	125	124
		SEM	3	3	4	4		3	4	4	3	3	2	3
C	Time to 50% relaxation (ms)	Average	222	228	306	315	208	209	290	280	189	190	258	253
		SEM	9	10	10	9	7	6	8	7	7	7	6	6
D	Ca2+ transient amplitude (Fura 2 ratio)	Average	8.763	9.638	5.8529	4.3824	8.402	8.425	5.901	5.25	6.867	5.037	5.157	5.575
		SEM	2.166	2.492	1.7865	1.7753	2.223	2.754	1.737	1.603	1.062	1.42	2.135	1.6
E	Time to 90% peak of Ca2+ transient (ms)	Average	60.7589	64.6575	72.2	75.3	61	68	71	74	59	72	75	75
		SEM	0.99433	1.27791	1.5	1.4	1	1	1	1	2	3	2	2
F	Time to 50% relaxation of Ca2+ transient (ms)	Average	224.194	257.376	347.7	332.8	193.439	223.73	296	266	175	208	224	228
		SEM	13.6988	14.5175	15	13.7	8.38966	11.4086	10	10	6	9	5	6
	Parameter		WT SHAM	MKO SHAM	WT TAC	MKO TAC
H	Ca2+ spark frequency (sparks/100 μm/s)	Average	4.926	4.305	5.847	5.524
		SEM	0.561	0.681	0.587	0.665
I	Amplitude (F/F0)	Average	0.083618	0.066648	0.070625	0.049911
		SEM	0.005985	0.006494	0.005663	0.004941
J	Derivative (dF/dt)	Average	5.86309	4.16089	4.7761	3.10326
		SEM	0.38095	0.298298	0.387025	0.272064
K	Time to peak (ms)	Average	14.5978	15.9704	15.066	17.1755
		SEM	0.401137	0.623543	0.375563	0.574675
L	FWHM (μm)	Average	1.20437	1.16466	1.26547	1.19127
		SEM	0.025885	0.026939	0.03324	0.026722
M	Tau (ms-1)	Average	48.9669	59.0864	58.9225	60.8518
		SEM	2.15366	2.46797	2.16839	2.25832
