# Supplementary material for: Myopalladin knockout mice develop cardiac dilation and show a maladaptive response to mechanical pressure overload
Source: eLife journal article supplement (doi:10.7554/elife.58313), 2021-09-24
Supplement: supp [file elife_poa_e58313_Figure_2_figure_supplement_1.docx]

**Figure 2–figure supplement 1:** CMC size in 4-month-old WT and MKO male mice. (**A**) Histograms and Gaussian distribution curves showing reduced adult CMC size in MKO mice compared to WT mice (n = 1274 CMCs from 3 WT mice and 1587 CMCs from 4 MKO mice). (**B**) Average CMC size in WT and MKO mice. Data are represented as mean ± SEM. ***p < 0.001; Student’s t-test.
