# Supplementary material for: Myopalladin knockout mice develop cardiac dilation and show a maladaptive response to mechanical pressure overload
Source: eLife journal article supplement (doi:10.7554/elife.58313), 2021-09-24
Supplement: supp [file elife_poa_e58313_Figure_3_figure_supplement_2.docx]

**
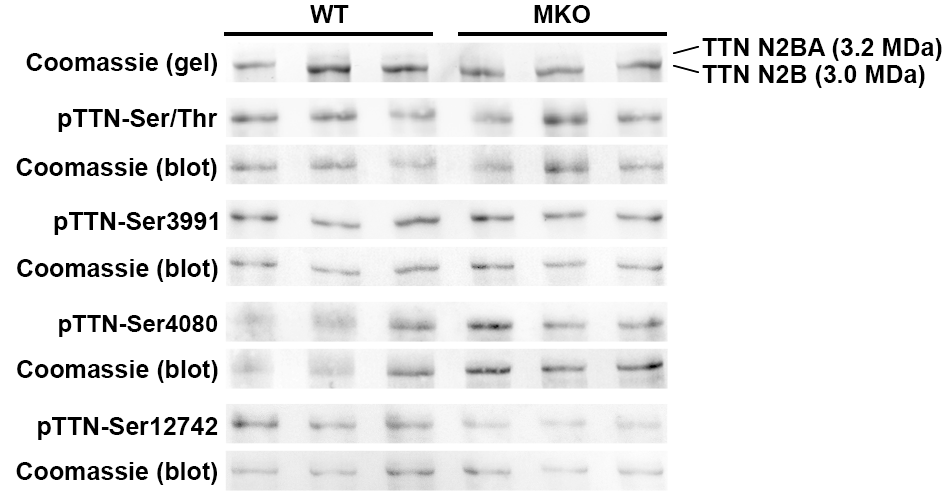
**

**Figure 3–figure supplement 2:** Titin isoform expression and phosphorylation in the left ventricle of 4-month-old WT and MKO male mice. Titin (TTN) isoform expression was determined by SDS-PAGE and Coomassie blue staining. The titin N2B isoform is the principal isoform in mouse heart. Titin phosphorylation was determined by Western blot analysis using anti-phosphoserine/threonine antibody (pTTN-Ser/Thr) and titin phosphosite-specific antibodies against Ser3991, Ser4080, and Ser12742. Total protein was determined by Coomassie blue staining of each blot.
