# Supplementary material for: Myopalladin knockout mice develop cardiac dilation and show a maladaptive response to mechanical pressure overload
Source: eLife journal article supplement (doi:10.7554/elife.58313), 2021-09-24
Supplement: supp [file elife_poa_e58313_Figure_3_source_data_1.xlsx]

## Sheet: Figure 3A-G - echo
Figure 3–source data 1 and Figure supplement 1: Echocardiographic analyses on WT and MKO male mice under basal conditions.
A-G		WT 10W
		Age (weeks)	BW (g)	HR (bpm)	LVIDd (mm)	LVIDs (mm)	IVSd (mm)	IVSs (mm)	LVPWd (mm)	LVPWs (mm)	FS (%)	EF (%)	RWT	CO (µl/min)
		10.3	26	771	3.65	2.22	0.84	1.22	0.8	1.23	39.1	70.4	0.449315	30.8
		10.3	21	638	3.56	2.19	0.78	1.21	0.75	1.27	38.4	69.7	0.429775	23.6
		10.3	24	556	3.76	2.3	0.74	1.21	0.78	1.17	38.9	70.1	0.404255	23.4
		10.6	27	613	3.5	2.21	0.83	1.2	0.79	1.27	36.8	67.8	0.462857	20.8
		10.6	26	639	3.58	2.21	0.84	1.2	0.83	1.19	38.3	69.6	0.46648	23.6
		10.6	27	557	3.33	2.04	0.83	1.13	0.76	1.22	38.7	70.3	0.477477	17.8
		10.6	23	594	3.23	1.98	0.76	1.25	0.83	1.23	38.5	70.1	0.49226	17.2
		10.6	24	566	3.34	2	0.82	1.26	0.64	1.26	40.1	71.9	0.437126	18.7
		10.3	21	627	3.47	2.18	0.74	1.11	0.62	1.07	37	68.1	0.391931	21.3
		10.3	24	507	3.65	2.3	0.72	1.23	0.76	1.23	37.1	67.9	0.405479	19.3
		9.9	25	620	3.31	1.96	0.79	1.08	0.75	1.19	40.7	72.7	0.465257	19.8
		9.9	26	627	3.26	1.97	0.79	1.15	0.88	1.19	39.6	71.5	0.51227	19.4
		9.9	25	626	3.13	1.73	0.78	1.13	0.79	1.26	44.8	77.5	0.501597	18.8
		8.4	24	609	3.54	2.21	0.74	1.19	0.68	1.14	37.6	68.7	0.40113	21.9
		8.4	22	575	3.1	1.95	0.71	1.11	0.69	1.23	37.1	68.5	0.451613	15
		8	28	564	3.21	1.98	0.76	1.07	0.85	1.18	38.4	70.1	0.501558	16.4
		8	27	647	3.28	1.94	0.73	1.15	0.73	1.18	41	73.1	0.445122	20.7
		8	29	510	3.3	2.02	0.76	1.08	0.91	1.22	38.8	70.4	0.506061	15.8
	Total	9.72222	24.9444	602.556	3.4	2.07722	0.775556	1.16556	0.768889	1.20722	38.9389	70.4667	0.455642	19.6176
	SEM	0.24261	0.539136	14.0875	0.0455755	0.0364325	0.0100073	0.0143537	0.0183981	0.0118489	0.448901	0.550045	0.009	0.646611
		MKO 10W
		Age (wks)	BW (g)	HR (bpm)	LVIDd (mm)	LVIDs (mm)	IVSd (mm)	IVSs (mm)	LVPWd (mm)	LVPWs (mm)	FS (%)	EF (%)	RWT	CO (µl/min)
		8.9	22	424	3.52	2.24	0.81	1.25	0.72	1.05	36.2	66.9	0.4347	14.4
		8.9	24	610	3.87	2.55	0.86	1.24	0.73	1.12	34	63.7	0.4109	25
		8.9	23	541	3.6	2.31	0.78	1.22	0.8	1.12	35.9	66.4	0.4389	19.5
		9.1	23	529	3.64	2.4	0.85	1.15	0.67	1.08	34.1	64	0.4176	19
		9.1	23	496	3.66	2.44	0.76	1.28	0.93	1.15	33.2	62.7	0.4617	17.4
		10.1	25	444	3.84	2.56	0.74	1.21	0.78	1.28	33.3	62.7	0.3958	17.8
		9.7	23	597	3.46	2.13	0.76	1.18	0.65	1.23	38.6	70	0.4075	20.9
		10.1	23	543	3.43	2.18	0.8	1.19	0.8	1.14	36.6	67.5	0.4665	17.9
		9.7	23	533	3.5	2.18	0.82	1.21	0.7	1.21	37.8	68.9	0.4343	18.7
		10.1	25	444	3.84	2.56	0.74	1.21	0.78	1.28	33.3	62.7	0.3958	17.8
		10.1	28	827	3.68	2.32	0.81	1.29	0.72	1.05	37.1	67.9	0.4158	32.3
		9.6	24	585	3.63	2.26	0.84	1.41	0.81	1.24	37.8	68.8	0.4545	22.2
		9.6	23	579	3.48	2.14	0.82	1.27	0.8	1.19	38.5	69.9	0.4655	20.3
		8.3	23	580	3.28	2.08	0.78	1.16	0.78	1.22	36.8	67.9	0.4756	17.4
		9.4	25	676	3.3	2	0.77	1.15	0.77	1.19	39.4	71.1	0.4667	21
		9.4	24	578	3.56	2.24	0.7	1.09	0.8	1.16	37.1	68	0.4213	20.8
		9.4	24	660	3.48	2.18	0.84	1.07	0.88	1.2	37.4	68.5	0.4943	22.4
		9.4	25	635	3.53	2.12	0.76	1.21	0.92	1.22	40	71.7	0.4759	23.5
		9.4	26	643	3.54	2.2	0.68	1.17	0.72	1.21	38	69.2	0.3955	23.1
		8.7	23	603	3.58	2.24	0.86	1.19	0.86	1.2	37.4	68.4	0.4804	22.3
		8.7	24	485	3.62	2.3	0.7	1.15	0.76	1.21	36.4	67.1	0.4033	17.9
		8.7	22	584	3.56	2.2	0.76	1.07	0.72	1.14	38.1	69.2	0.4157	21.6
		9.6	24	607	3.34	2.07	0.88	1.23	0.92	1.16	38	69.4	0.5389	18.8
	Total	9.34348	23.8696	574.043	3.56261	2.25652	0.787826	1.2	0.783478	1.17609	36.7391	67.5043	0.442048	19.9864
	SEM	0.107031	0.283292	18.3513	0.0325055	0.0326111	0.0114719	0.0157676	0.0162199	0.0132286	0.408591	0.554481	0.00780126	0.541774
		WT 4M
		Age (wks)	BW (g)	HR (bpm)	LVIDd (mm)	LVIDs (mm)	IVSd (mm)	IVSs (mm)	LVPWd (mm)	LVPWs (mm)	FS (%)	EF (%)	RWT	CO (µl/min)
		17.3	30	607	3.56	2.15	0.86	1.28	0.85	1.26	39.5	71	0.4803	23.1
		17.3	28	656	3.51	2.12	0.71	1.23	0.74	1.25	39.7	71.3	0.4131	24.3
		17.3	28	458	3.6	2.13	0.72	1.19	0.8	1.19	40.8	72.5	0.4222	17.9
		17.3	28	590	3.11	1.82	0.82	1.31	0.83	1.23	41.4	73.7	0.5305	16.5
		17.6	29	519	3.3	1.98	0.85	1.33	0.9	1.15	40.2	72.1	0.5303	16.6
		17.6	31	725	3.32	1.98	0.86	1.31	0.91	1.26	40.5	72.5	0.5331	23.9
		17.6	28	619	3.23	1.92	0.86	1.27	0.77	1.15	40.5	72.5	0.5046	18.6
		17.6	27	581	3.4	1.93	0.8	1.18	0.82	1.16	43.2	75.4	0.4765	20.9
		17.3	26	588	3.42	2.2	0.82	1.21	0.73	1.13	35.7	66.4	0.4532	18.8
		17.3	28	646	3.33	1.89	0.76	1.31	0.75	1.19	43.2	75.6	0.4535	22
		17	29	481	3.53	2.27	0.82	1.24	0.76	1.15	35.7	66.3	0.4476	16.4
		17	34	547	3.74	2.41	0.74	1.25	0.9	1.17	35.6	65.9	0.4385	21.3
		16.6	28	552	3.67	2.35	0.86	1.21	0.78	1.24	36	66.5	0.4469	21
		16.6	28	574	3.54	2.28	0.8	1.24	0.74	1.17	35.6	66.2	0.435	20.1
		17.7	28	594	3.42	1.92	0.82	1.27	0.9	1.24	43.7	76	0.5029	21.4
		17.7	28	568	3.34	1.89	0.76	1.22	0.71	1.16	43.5	75.8	0.4401	19.9
		17.7	27	542	3.72	2.37	0.87	1.35	0.85	1.27	36.4	66.9	0.4624	21.1
		17.6	31	561	3.86	2.37	0.86	1.4	0.8	1.17	38.6	69.6	0.4301	25.2
		16.6	28	648	3.43	2.06	0.73	1.12	0.78	1.22	39.9	71.7	0.4402	22.7
		16.6	27	574	3.44	2.2	0.7	1.15	0.78	1.15	36.1	66.9	0.4302	18.9
		17.7	30	556	3.57	2	0.75	1.21	0.76	1.23	44.1	76.2	0.423	22.8
		17.7	31	581	3.28	2.1	0.82	1.08	0.89	1.17	36	66.9	0.5213	16.8
		17.7	31	608	3.26	1.92	0.88	1.16	0.82	1.22	41.1	73.2	0.5215	18.8
		17	29	686	3.25	1.97	0.8	1.08	0.98	1.25	39.4	71.2	0.5477	20.6
		17	30	650	3.44	2.06	0.82	1.13	0.8	1.24	40	71.7	0.4709	22.8
		17	29	582	3.48	2.02	0.77	1.17	0.88	1.29	42.1	74.1	0.4741	21.5
		17.3	30	650	3.48	2.18	0.79	1.07	0.82	1.18	37.5	68.6	0.4626	22.8
		17.3	34	580	3.16	1.92	0.76	1.09	0.87	1.22	39.3	71.2	0.5158	16.2
		17.3	27	489	3.36	2.03	0.76	1.14	0.72	1.17	39.6	71.4	0.4405	16.1
		17.3	31	596	3.41	2.01	0.74	1.16	0.77	1.19	41.1	73	0.4428	20.9
		18	30	990	3.49	2.08	0.79	1.3	0.76	1.19	40.5	72.3	0.4441	36.6
		16.6	32	630	3.44	2.07	0.88	1.29	0.76	1.21	39.9	71.6	0.4767	22.1
		17.7	27	563	3.48	2.02	0.86	1.28	0.71	1.22	41.8	73.8	0.4511	20.8
		17.7	31	640	3.27	1.8	0.92	1.33	0.82	1.17	44.8	77.3	0.5321	21.1
		17.7	32	639	3.49	2.07	0.89	1.3	0.81	1.27	40.7	72.5	0.4871	23.6
		17.7	31	636	3.4	2.1	0.93	1.29	0.86	1.24	38.2	69.6	0.5265	21
		17.7	29	656	3.72	2.24	0.92	1.37	0.87	1.27	39.9	71.4	0.4812	27.6
		17.7	33	623	3.6	2.15	0.92	1.38	0.95	1.29	40.3	72	0.5194	24.3
		17.4	28	646	3.3	1.9	0.91	1.38	0.84	1.29	42.4	74.6	0.5303	21.3
		17.4	27	638	2.95	1.67	0.86	1.38	0.8	1.21	43.4	76.1	0.5627	16.6
		17.4	30	571	3.28	2.07	0.84	1.41	0.76	1.31	37	68.2	0.4878	17.1
		17.4	28	643	2.99	1.67	0.86	1.43	0.9	1.28	44	76.8	0.5886	17.4
		17.4	28	570	3.23	1.92	0.81	1.31	0.78	1.26	40.7	72.7	0.4923	17.7
	Total	17.3581	29.4211	605.884	3.41395	2.0514	0.82093	1.2514	0.814651	1.21581	39.9907	71.6558	0.480728	20.4881
	SEM	0.055365	0.302795	12.1637	0.028642	0.0261274	0.00933859	0.0147144	0.00996394	0.00723921	0.397378	0.488563	0.00659298	0.432804
		MKO 4M
		Age (wks)	BW (g)	HR M-mode (bpm)	LVIDd (mm)	LVIDs (mm)	IVSd (mm)	IVSs (mm)	LVPWd (mm)	LVPWs (mm)	FS (%)	EF (%)	RWT	CO (µl/min)
		18.1	24	522	4.02	2.79	0.78	1.29	0.76	1.15	30.5	58.5	0.3831	21.9
		18.1	26	602	3.62	2.54	0.82	1.15	0.74	1.06	29.7	57.7	0.4309	19.3
		18.1	25	525	3.88	2.59	1	1.37	0.84	1.27	33.3	62.7	0.4742	21.5
		18.1	28	516	3.73	2.58	0.81	1.2	0.8	1.11	30.8	59.3	0.4316	18.1
		18.1	25	536	3.87	2.65	0.76	1.18	0.8	1.13	31.6	60.2	0.4031	20.9
		18.1	27	560	3.75	2.61	0.94	1.09	0.82	1.19	30.4	58.7	0.4693	19.6
		17.3	26	585	3.86	2.65	0.79	1.2	0.79	1.19	31.2	59.7	0.4093	22.2
		16.7	28	638	3.59	2.44	0.88	1.19	0.85	1.23	32.1	61.3	0.4819	21.1
		18.9	26	557	4.03	2.88	0.77	1.24	0.86	1.03	28.6	55.6	0.4045	22.3
		18.9	25	447	3.96	2.7	0.86	1.24	0.74	1.08	31.8	60.5	0.404	18.3
		18.9	27	606	3.82	2.77	0.8	1.09	0.89	0.97	27.4	54	0.4424	20.6
		17.6	29	594	3.81	2.57	0.79	1.26	0.81	1.15	32.6	61.7	0.4199	22.6
		17.6	27	579	4.22	2.97	0.71	1.09	0.82	1.11	29.7	57.2	0.3626	26.1
		17.6	29	541	4.49	3.22	0.74	1.16	0.94	1.3	28.3	54.7	0.3742	27.1
		17.1	26	443	4.01	2.95	0.86	1.16	0.94	1.25	26.6	52.6	0.4489	16.4
		17.1	26	505	4.12	3	0.79	1.04	0.76	1.05	27.2	53.4	0.3762	20.2
		17.1	25	506	3.64	2.47	0.69	1.08	0.88	1.15	32.2	61.4	0.4313	17.2
		17.1	29	613	3.8	2.67	0.77	1.11	0.88	1.24	29.8	57.7	0.4342	22.1
		17.4	27	624	3.7	2.61	0.84	1.18	0.79	1.09	29.3	57	0.4405	20.6
		17.4	27	565	3.88	2.71	0.84	1.22	0.8	1.16	30.3	58.3	0.4227	21.5
		18.1	28	623	3.88	2.7	0.89	1.19	0.8	1.11	30.4	58.5	0.4356	23.7
		16.1	25	510	3.74	2.58	0.86	1.17	0.82	1.14	30.9	59.4	0.4492	17.9
		16.1	25	613	3.88	2.75	0.86	1.14	0.81	1.19	29.1	56.6	0.4304	22.7
		17.4	29	546	4.29	2.99	0.95	1.25	0.89	1.19	30.2	57.8	0.4289	26.2
		17.4	26	628	3.76	2.8	0.83	1.15	0.85	1.11	25.6	51.1	0.4468	19.5
		17.4	26	579	3.58	2.46	0.9	1.23	0.86	1.24	31.4	60.2	0.4916	18.5
		17.4	22	555	3.55	2.29	0.86	1.4	0.82	1.26	35.5	66	0.4732	19.4
	Total	17.6	26.4074	559.926	3.86963	2.70148	0.829259	1.18778	0.828148	1.1537	30.2407	58.2148	0.429648	21.0185
	SEM	0.138469	0.325809	10.09	0.0431207	0.0393961	0.0138153	0.0160868	0.010198	0.0154712	0.41142	0.630351	0.00637847	0.515349
		WT 6M
		Age (wks)	BW (g)	HR M-mode (bpm)	LVIDd (mm)	LVIDs (mm)	IVSd (mm)	IVSs (mm)	LVPWd (mm)	LVPWs (mm)	FS (%)	EF (%)	RWT	CO (µl/min)
		25.9	31	633	3.72	2.35	0.82	1.2	0.84	1.31	36.9	67.6	0.4462	25.3
		25.9	31	568	3.7	2.3	0.8	1.23	0.74	1.23	38	69	0.4162	22.7
		25.9	31	576	3.79	2.42	0.81	1.31	0.84	1.24	36	66.4	0.4354	23.6
		26.1	32	567	3.64	2.2	0.72	1.21	0.81	1.28	39.4	70.8	0.4203	22.7
		26.1	33	659	3.64	2.28	0.97	1.25	0.84	1.21	37.5	68.5	0.4973	25
		26.1	29	645	3.51	2.25	0.83	1.38	0.84	1.3	35.9	66.5	0.4758	21.9
		26.3	29	536	3.56	2.26	0.92	1.25	0.76	1.23	36.5	67.3	0.4719	19.3
		25.9	27	671	3.46	2.09	0.83	1.17	0.77	1.2	39.7	71.3	0.4624	23.5
		26.1	30	645	3.72	2.19	0.85	1.27	0.78	1.26	41.1	72.7	0.4382	27.7
		26.1	33	641	3.87	2.48	0.82	1.23	0.74	1.14	35.9	66.1	0.4031	27.6
		25.9	30	542	3.56	2.28	0.85	1.16	0.84	1.18	35.9	66.5	0.4747	19
		25.9	35	628	3.95	2.55	0.94	1.32	0.92	1.25	35.5	65.5	0.4709	28.3
		25.9	34	577	3.71	2.43	0.88	1.3	0.82	1.22	34.5	64.5	0.4582	21.9
		25.9	33	637	3.53	2.18	0.91	1.29	0.79	1.16	38.3	69.6	0.4816	22.9
		27.4	31	553	3.49	2.19	0.83	1.23	0.76	1.17	37.3	68.3	0.4556	19.4
		27.4	35	643	3.54	2.17	0.78	1.22	0.78	1.24	38.5	69.9	0.4407	23.1
	Total	26.175	31.5	607.562	3.64938	2.28875	0.8475	1.25125	0.804375	1.22625	37.3062	68.1562	0.453031	23.3687
	SEM	0.123322	0.562731	11.4229	0.0352428	0.0317001	0.0159034	0.0145165	0.0120405	0.0121749	0.442669	0.569208	0.00652266	0.719764
		MKO 6M
		Age (wks)	BW (g)	HR M-mode (bpm)	LVIDd (mm)	LVIDs (mm)	IVSd (mm)	IVSs (mm)	LVPWd (mm)	LVPWs (mm)	FS (%)	EF (%)	RWT	CO (µl/min)
		28.7	29	646	3.98	2.91	0.8	1.21	0.83	1.15	26.8	53	0.4095	23.9
		28.1	30	560	3.99	2.74	0.82	1.19	0.79	1.24	31.4	59.8	0.4035	23.5
		26.7	27	615	3.94	2.79	0.85	1.09	0.85	1.15	29.2	56.6	0.4315	23.4
		26.7	26	418	3.86	2.72	0.81	1.29	0.9	1.16	29.6	57.3	0.443	15.5
		26.7	29	497	3.75	2.67	0.83	1.13	0.66	1.07	28.8	56.3	0.3973	16.9
		26.7	25	590	3.9	2.8	0.74	1.12	0.72	1.2	28.1	55	0.3744	21.2
		26.7	26	582	3.8	2.65	0.76	1.12	0.9	1.28	30.2	58.3	0.4368	21
		26	31	604	3.79	2.57	0.84	1.17	0.82	1.13	32.1	61	0.438	23
		26.7	26	628	4.13	3.07	0.87	1.3	0.86	1.21	25.6	50.8	0.4189	23.9
		26.7	27	580	4.02	2.91	0.79	1.17	0.76	1.08	27.6	54.2	0.3856	22
		26.7	25	519	4.08	2.97	0.78	1.16	0.86	1.21	27.3	53.6	0.402	20.2
		26.7	28	577	4.43	3.31	0.72	1.11	0.77	1	25.2	50	0.3363	25.4
		26.3	31	629	3.83	2.53	0.95	1.15	0.85	1.27	33.8	63.4	0.47	25.2
		26.4	30	526	3.46	2.41	0.91	1.35	0.88	1.21	30.3	58.8	0.5173	15.3
		26.4	26.9	547	3.5	2.35	0.95	1.32	0.87	1.25	33	62.5	0.52	17.5
		26.4	30.5	594	3.68	2.56	0.82	1.27	0.76	1.18	30.5	58.8	0.4293	20.2
		26.4	26.3	497	3.74	2.57	0.91	1.26	0.74	1.16	31.3	59.9	0.4412	17.9
		26.4	27.7	527	3.99	2.91	0.93	1.34	0.94	1.27	27.2	53.6	0.4687	19.5
	Total	26.7444	27.8556	563.111	3.88167	2.74667	0.837778	1.20833	0.82	1.17889	29.3333	56.8278	0.429072	20.8611
	SEM	0.151511	0.478507	13.6475	0.0535489	0.0568049	0.0165003	0.0202799	0.0172449	0.0178389	0.580905	0.904304	0.0108694	0.757237
		Excluded outliers are indicated in red

## Sheet: Figure 3H - HW to BW
Figure 3–Source data 1 and Figure supplement 1: HW/BW measurements on MKO and WT male mice under basal conditions.
H		WT 10W				MKO 10W
		BW (g)	HW (mg)	HW/BW (mg/g)		BW (g)	HW (mg)	HW/BW (mg/g)
		27.6	142	5.14493		23	120	5.21739
		24.4	137	5.61475		21.6	109	5.0463
		23.9	119	4.97908		22.9	110	4.80349
		25.6	134	5.23438		21.6	108	5
		24.1	120	4.97925		21.2	111	5.23585
		25.3	120	4.74308		20.3	121	5.96059
		23.9	117	4.8954		21.9	102	4.65753
		27.5	130	4.72727		22.5	121	5.37778
		24	129	5.375		20	113	5.65
		23.1	114	4.93506		19	115	6.05263
		21.5	113	5.25581		24.9	120.4	4.83534
		25.9	122	4.71042		24	122.6	5.10833
						22.6	115	5.0885
						23.3	133	5.70815
						23.3	127	5.45064
						23.4	115	4.91453
						21.9	102	4.65753
						24.1	127	5.26971
						21.1	100	4.73934
						21.1	103	4.88152
						21.1	102	4.83412
						25.2	141	5.59524
						22.5	123	5.46667
						23.7	120	5.06329
	Average	24.7333	124.75	5.04954		22.3417	115.875	5.19227
	SEM	0.506523	2.72231	0.0812191		0.314096	2.1487	0.0808004
		WT 4M				MKO 4M
		BW (g)	HW (mg)	HW/BW (mg/g)		BW (g)	HW (mg)	HW/BW (mg/g)
		27	123	4.55556		26.3	143	5.43726
		25.9	121	4.67181		25.1	133	5.2988
		29.9	182	6.08696		25.4	123	4.84252
		32.2	153	4.75155		24.6	122	4.95935
		28.6	134	4.68531		28.5	152	5.33333
		30.6	144	4.70588		27	136	5.03704
		30.4	133	4.375		26.3	138	5.24715
		30.1	151	5.01661		26.1	120	4.5977
		33.1	152	4.59215		23.7	117	4.93671
		26.7	120	4.49438		27	140	5.18519
		31.7	154	4.85804		28.7	171	5.95819
		27.2	125	4.59559		25.2	127	5.03968
		26.3	111	4.22053		23.4	122	5.21368
		29.2	131	4.4863		20.9	119	5.69378
		27.1	137	5.05535
		28.6	127	4.44056
		28.3	122	4.31095
	Average	28.9941	136.471	4.70015		25.5857	133.071	5.1986
	SEM	0.524297	4.27984	0.10262		0.55051	4.05114	0.0930306
		WT 6M				MKO 6M
		BW (g)	HW (mg)	HW/BW (mg/g)		BW (g)	HW (mg)	HW/BW (mg/g)
		31	191	6.16129		28	150	5.35714
		31	129	4.16129		27.8	139	5
		32	151	4.71875		28.3	143	5.053
		33	165	5		26.2	132	5.03817
		29	166	5.72414		26	134	5.15385
		29	132	4.55172		25	127	5.08
		27	139	5.14815		23.9	137	5.73222
		32	127	3.96875		29.6	136	4.59459
		34.4	196	5.69767		26.9	145	5.39033
		34.5	175	5.07246		26.3	146	5.55133
		31.2	156	5		27.7	149	5.37906
		33	159	4.81818
		30.5	148	4.85246
		34.2	151	4.4152
		34.1	180	5.27859
		25.3	127	5.01976
		32.3	165	5.10836
		33.6	133	3.95833
		32.6	155	4.7546
		34	142	4.17647
	Average	31.685	154.35	4.87931		26.8818	139.818	5.21179
	SEM	0.564441	4.61535	0.130309		0.487819	2.22718	0.0938561
