# Supplementary material for: Myopalladin knockout mice develop cardiac dilation and show a maladaptive response to mechanical pressure overload
Source: eLife journal article supplement (doi:10.7554/elife.58313), 2021-09-24
Supplement: supp [file elife_poa_e58313_Figure_3_source_data_2.xlsx]

## Sheet: Figure 3I, J
Figure 3–source data 2: Sarcomere-length tension relationship and calcium jump experiments in cardiac myofibrils from WT and MKO male mice.
I	WT					MKO
	SL (μm)	SEM SL	RT (nM mm-2)	SEM RT		SL (μm)	SEM SL	RT (nM mm-2)	SEM RT
	1.8	0.02	0	0		1.82	0.04	0	0
	1.91	0.02517	6.50371	1.00738		1.96	0.01	5.77	0.93
	2.05	0.01	7.46	1.01		2.06	0.01	9.12	2.35
	2.17	0.01	14.92	1.63		2.17	0.01	14.6	2.19
	2.25	0.01	15.2	2.23		2.23	0.01	25.1	2.57
	2.33	0.01	20.85	2.29		2.35	0.01	28.72	4.41
	2.47	0.01	24.7	2.24		2.45	0.01	43.92	3.97
	2.55	0.01	37.04	2.83		2.56	0.01	55.61	4.65
	SL, sarcomere length
	RT, Resting tension
J	P5.75/P4.50
	WT	MKO
	0.69	0.74
	0.7	0.7
	0.64	0.66
	0.74	0.71
	0.71	0.53
	0.7	0.73
	0.67	0.67
	0.66	0.65
	0.75	0.6
	0.78	0.76
		0.82
		0.66
