# Supplementary material for: Myopalladin knockout mice develop cardiac dilation and show a maladaptive response to mechanical pressure overload
Source: eLife journal article supplement (doi:10.7554/elife.58313), 2021-09-24
Supplement: supp [file elife_poa_e58313_Figure_3_source_data_3.xlsx]

## Sheet: Figure 3K-O
Figure 3–source data 3: Densitometry of titin blots.
K		TTN N2BA/N2B ratio
		WT	MKO
		0.09	0.11
		0.14	0.14
		0.12	0.1
	Average	0.116667	0.116667
	SEM	0.0145297	0.0120185
L		pTTN-Ser/Thr
		WT	MKO
		0.98	1.01
		1	1.1
		1.12	1.12
		0.93	0.96
		0.89	0.98
		1.08	1.01
	Average	1	1.1
	SEM	0.0164957	0.0436436
M		pTTN-Ser3991
		WT	MKO
		0.87	0.97
		0.93	0.85
		0.98	0.99
		0.92	1.1
		1.16	1.04
		1.13	1.1
	Average	1	0.76087
	SEM	0.143791	0.0473793
N		pTTN-Ser4080
		WT	MKO
		1.04	1.26
		0.93	1.21
		1.02	1.25
		1.06	1.05
		1.01	0.97
		0.93	1.05
	Average	1	1.18056
	SEM	0.219493	0.160174
O		pTTN-Ser12742
		WT	MKO
		0.97	1.14
		1.03	1.04
		1.04	1.19
		1.04	1.01
		0.98	1.15
		0.95	0.88
	Average	1	0.865854
	SEM	0.0879403	0.0520976
