# Supplementary material for: Myopalladin knockout mice develop cardiac dilation and show a maladaptive response to mechanical pressure overload
Source: eLife journal article supplement (doi:10.7554/elife.58313), 2021-09-24
Supplement: supp [file elife_poa_e58313_Figure_5_source_data_1.xlsx]

## Sheet: Figure 5B, C
Figure 5–source data 1: Measurements of fibrotic area in the left ventricle of WT and MKO male mice 4 weeks after TAC or SHAM.
C		SHAM 4W - Fibrotic area (%)			TAC 4W - Fibrotic area (%)
		WT	MKO		WT	MKO
		0.598872	0.635057		1.00433	1.44594
		0.728228	0.589943		0.752182	1.29388
		0.647493	0.658365		0.79642	1.13837
	Average	0.658198	0.627788		0.850977	1.29273
	SEM	0.380011	0.362454		0.491312	0.74636
