# Supplementary material for: Myopalladin knockout mice develop cardiac dilation and show a maladaptive response to mechanical pressure overload
Source: eLife journal article supplement (doi:10.7554/elife.58313), 2021-09-24
Supplement: supp [file elife_poa_e58313_Figure_5_source_data_2.xlsx]

## Sheet: Figure 5D, E
Figure 5–source data 2: CMC size measurements in WT and MKO male mice 4 weeks after TAC or SHAM.
D, E	CMC size (μm2)
	SHAM		TAC
	WT	MKO	WT	MKO
	361.584	241.658	291.6	300.64
	174.085	213.352	177.584	231.239
	322.51	178.286	275.27	289.559
	195.955	198.565	188.374	493.387
	239.695	140.263	204.995	343.505
	191.873	198.565	151.632	117.515
	218.992	212.507	180.209	254.858
	230.072	144.91	269.147	222.782
	181.084	148.29	340.006	300.64
	302.389	212.929	229.198	377.039
	309.388	204.48	174.668	200.038
	189.248	181.243	176.71	241.445
	345.838	253.487	250.484	510.3
	256.608	234.053	255.733	174.96
	254.275	186.313	276.728	236.779
	236.779	273.344	142.009	460.145
	211.993	282.216	201.787	607.403
	303.847	182.933	200.912	384.62
	228.906	290.243	146.092	268.564
	181.667	131.813	212.285	360.126
	192.164	203.212	203.537	264.481
	242.611	222.224	221.908	350.795
	211.118	153.36	128.012	229.781
	169.128	216.732	241.445	475.308
	210.244	210.394	248.443	200.621
	189.832	275.456	196.247	323.384
	123.93	97.17	293.933	312.304
	199.163	180.398	268.564	196.538
	250.484	160.119	192.748	323.968
	251.942	169.414	213.16	293.35
	248.152	136.038	257.191	415.53
	424.57	128.856	212.285	159.797
	230.072	173.639	268.564	229.781
	306.763	144.91	233.28	326.009
	302.681	172.371	351.086	496.012
	370.915	109.422	232.114	364.5
	251.068	114.069	296.849	242.611
	210.244	217.154	285.768	474.433
	373.248	213.774	207.036	222.491
	179.042	163.922	136.469	378.788
	260.69	185.468	148.716	484.639
	241.736	102.24	391.91	300.056
	218.7	337.983	248.152	180.792
	258.358	121.251	244.944	300.931
	270.022	250.107	188.374	335.34
	260.982	198.565	228.323	605.07
	257.774	76.046	165.629	367.124
	174.96	227.716	250.776	287.518
	275.27	255.177	216.367	288.392
	156.589	259.825	393.952	317.844
	157.464	253.487	324.551	340.589
	170.003	195.185	266.522	250.776
	129.47	184.623	341.172	271.771
	156.881	263.204	170.586	118.39
	153.965	296.58	271.188	91.5623
	149.008	210.817	233.863	269.73
	143.467	180.398	130.637	301.514
	184.583	174.061	249.026	377.622
	218.992	111.112	207.328	179.626
	155.131	188.426	321.052	269.438
	146.966	188.848	230.364	239.112
	151.34	200.255	251.359	230.364
	172.336	121.674	326.592	279.061
	226.865	178.286	358.668	225.99
	214.326	204.48	326.592	248.443
	111.974	262.359	259.232	304.43
	91.2707	299.96	206.453	272.646
	141.134	213.774	336.798	202.954
	149.299	114.914	308.513	340.006
	142.301	150.402	253.692	221.616
	142.884	166.879	209.952	281.102
	144.634	230.251	310.262	174.96
	159.505	327.844	431.276	133.844
	129.179	201.1	326.592	156.006
	155.423	279.259	317.552	276.728
	84.564	186.736	341.464	139.385
	70.8588	168.992	254.275	170.878
	80.19	247.995	378.788	361.584
	73.7749	174.484	324.551	236.779
	70.2756	210.394	206.161	166.504
	59.778	226.026	220.45	158.047
	42.5735	263.627	258.358	204.412
	93.8952	169.837	207.619	477.641
	102.352	176.596	291.6	331.841
	82.5228	195.185	380.83	400.658
	77.274	133.503	220.45	560.747
	105.268	169.837	259.524	332.716
	97.686	115.337	251.942	204.412
	67.3596	117.449	288.392	277.895
	69.984	119.139	348.17	476.766
	62.1108	87.031	290.434	210.827
	85.7304	95.48	279.353	132.095
	97.3944	81.961	347.587	242.903
	141.426	177.019	281.977	195.955
	134.719	110.267	255.15	190.998
	198.288	163.922	216.659	262.44
	88.0632	102.662	239.695	236.196
	112.558	83.651	261.565	338.839
	118.39	220.111	253.692	167.962
	101.768	117.027	287.226	223.949
	126.554	187.581	257.483	240.57
	89.2297	132.236	325.717	157.756
	143.176	94.635	218.408	193.914
	129.47	116.604	227.448	260.107
	117.515	56.19	218.7	213.743
	85.7304	106.887	235.904	149.299
	103.518	238.701	329.8	191.29
	99.144	143.643	216.659	124.513
	90.6875	107.732	202.662	148.716
	117.806	117.872	267.397	186.624
	75.816	171.949	363.625	374.414
	113.432	154.627	294.808	278.77
	169.42	97.593	249.318	187.207
	113.724	127.589	208.202	95.3532
	134.428	136.038	287.518	249.026
	142.009	110.267	222.491	286.06
	113.141	130.546	302.389	163.879
	106.726	103.507	290.434	126.846
	120.139	69.709	288.101	232.988
	172.627	94.635	188.374	210.535
	122.472	163.922	352.836	284.602
	104.684	120.406	303.556	173.794
	108.767	108.577	297.724	376.747
	153.673	114.492	414.947	333.59
	116.64	143.22	303.556	241.153
	72.3168	125.476	313.47	198.871
	88.9381	129.279	319.594	179.917
	90.3959	85.763	284.31	255.733
	88.6464	90.41	292.183	165.629
	95.3532	100.972	315.22	195.372
	127.429	104.352	336.798	210.244
	192.748	106.887	256.025	132.97
	150.757	100.972	410.573	163.004
	149.882	119.984	228.906	149.008
	152.507	143.643	322.51	193.331
	172.044	112.802	292.766	263.606
	128.596	149.558	384.912	227.74
	137.052	250.107	279.644	300.64
	90.9791	111.534	434.484	270.896
	111.1	155.472	320.468	218.408
	120.722	137.306	253.984	346.129
	134.136	145.755	235.321	247.277
	139.385	186.736	193.622	205.286
	112.266	187.158	356.335	172.627
	146.383	210.817	209.66	177.876
	119.264	154.205	268.272	188.082
	120.431	125.054	313.178	160.963
	111.683	135.193	314.053	156.006
	115.765	113.224	270.022	246.985
	156.298	112.802	209.952	176.126
	343.213	138.151	283.727	119.264
	132.095	182.933	284.602	134.719
	195.08	137.728	284.31	197.413
	174.085	88.721	271.771	332.424
	191.29	117.027	357.793	188.374
	184	99.705	227.156	146.383
	181.084	175.329	328.633	270.313
	128.012	152.937	317.844	289.267
	117.223	138.573	321.635	195.08
	115.474	102.662	330.091	509.425
	160.963	95.058	228.031	239.987
	194.789	143.643	221.324	286.934
	221.908	61.682	285.185	242.32
	200.038	121.251	225.115	204.995
	229.489	122.519	381.704	353.419
	261.565	157.585	307.93	325.426
	307.638	160.119	294.224	145.8
	140.26	109	426.611	403.283
	311.72	147.023	397.159	506.801
	147.55	90.833	336.798	221.908
	157.172	81.538	388.994	398.034
	176.418	97.17	538.877	314.636
	218.408	153.36	537.71	379.663
	281.686	89.143	478.224	337.964
	109.058	108.577	356.044	197.996
	232.405	106.887	393.66	181.958
	249.318	160.964	334.757	307.638
	114.016	129.279	336.506	299.473
	183.708	112.802	393.952	207.911
	152.507	117.449	337.09	141.718
	154.84	81.961	283.144	218.117
	241.153	119.139	335.34	229.198
	243.778	109.845	250.193	136.469
	178.168	95.903	223.657	354.002
	323.968	103.507	260.982	226.865
	235.321	108.577	215.784	218.408
	98.8524	98.86	263.315	316.094
	212.576	105.197	433.318	156.589
	85.1472	69.709	391.327	326.884
	165.629	109.845	273.812	384.912
	175.835	144.488	360.126	214.618
	160.672	108.155	330.674	260.69
	227.74	156.317	398.909	262.44
	192.748	121.251	348.754	233.28
	157.756	92.523	320.468	172.919
	230.947	119.562	263.315	258.941
	212.576	158.007	226.573	243.486
	182.542	125.899	319.594	192.164
	181.375	125.476	308.221	239.112
	221.616	125.899	288.976	207.328
	195.372	136.883	345.838	246.11
	125.68	94.213	420.779	161.546
	205.578	99.283	382.579	185.458
	213.743	78.159	380.538	189.54
	203.828	82.806	261.565	130.054
	200.621	106.465	162.713	161.255
	228.906	144.91	265.356	149.591
	191.873	109.845	294.516	197.705
	227.448	111.957	227.448	221.908
	343.213	134.771	235.904	146.675
	258.941	73.934	259.816	124.805
	280.811	130.546	324.259	163.004
	238.529	146.6	321.052	142.009
	192.748	163.077	189.832	115.474
	180.209	119.139	228.614	196.538
	336.506	94.635	346.129	113.141
	251.942	110.267	242.028	140.843
	188.374	92.945	258.066	142.009
	146.092	85.341	227.448	131.512
	256.9	84.073	162.713	228.614
	81.3564	62.104	217.534	279.061
	289.267	122.941	196.538	136.76
	260.982	113.647	226.865	205.87
	333.882	94.635	237.946	128.304
	135.302	141.53	347.587	146.675
	171.752	115.759	209.952	159.797
	258.941	121.674	190.415	168.836
	283.144	101.817	345.838	179.042
	214.034	118.294	267.106	226.282
	260.982	148.713	409.406	301.223
	141.134	99.705	288.684	202.37
	180.209	80.693	304.43	161.546
	186.916	98.438	285.086	238.237
	155.423	108.577	414.901	135.011
	192.748	97.593	347.617	218.7
	152.507	99.283	278.432	248.84
	138.802	120.829	341.385	180.398
	308.513	194.34	386.065	178.709
	282.56	172.371	284.03	134.348
	188.082	165.189	312.549	196.03
	132.095	98.86	267.13	238.701
	252.817	153.36	234.702	226.449
	180.792	121.674	313.711	222.646
	214.909	171.949	175.34	133.081
	197.122	122.519	237.237	206.592
	190.123	215.042	313.5	182.933
	251.068	166.457	299.557	201.945
	218.992	119.984	252.025	200.255
	139.093	136.038	136.998	218.844
	149.008	160.119	170.27	233.208
	108.475	157.585	192.769	260.669
	214.034	127.589	277.904	252.642
	145.508	176.596	251.814	228.984
	165.046	125.054	242.624	227.716
	144.925	179.131	173.544	234.476
	156.881	132.658	107.422	168.147
	182.25	157.585	150.201	242.08
	163.588	128.011	139.216	209.972
	150.174	137.306	175.446	157.585
	149.008	166.879	206.5	160.542
	139.385	119.562	296.283	168.992
	166.212	160.964	196.149	223.069
	136.177	114.914	293.536	179.976
	159.505	137.728	238.294	201.522
	147.258	129.701	232.273	124.209
	245.236	129.279	157.595	112.802
	165.92	57.88	218.753	183.778
	151.049	83.228	198.367	205.747
	183.125	76.891	130.977	244.193
	121.306	101.395	131.505	215.464
	170.003	142.798	158.651	225.181
	147.55	94.635	226.463	183.778
	144.342	61.682	229.632	294.468
	171.752	133.081	199.317	238.278
	86.6052	99.705	250.758	174.061
	93.8952	111.957	270.721	193.073
	73.7749	118.717	206.289	176.596
	90.1045	93.79	212.415	131.391
	177.293	199.41	200.796	255.177
	162.421	171.526	195.092	262.782
	128.304	178.286	513.979	187.581
	102.06	167.724	505.001	161.387
	174.96	166.879	458.842	187.581
	289.559	217.154	373.601	100.55
	133.844	215.042	376.876	95.48
	195.372	209.127	515.141	113.224
	190.998	257.712	424.83	120.406
	206.453	199.833	381.84	82.383
	218.408	241.658	402.543	188.426
	218.117	186.736	408.458	227.294
	231.822	221.379	325.647	181.666
	132.678	128.434	240.829	127.589
	162.421	141.108	251.18	219.689
	190.706	167.302	323.851	186.313
	106.142	144.065	269.982	175.751
	289.559	125.054	207.028	296.158
	136.177	140.685	355.117	542.885
	165.046	106.042	237.66	441.068
	142.592	130.123	274.418	533.591
	128.012	108.155	227.203	417.409
	180.5	99.283	181.466	374.316
	160.963	123.786	267.975	465.572
	351.961	119.139	185.692	472.754
	219.575	120.406	199.423	310.099
	186.916	113.224	216.534	407.27
	142.301	129.701	245.793	420.789
	145.508	155.05	198.789	394.173
	231.822	166.034	193.402	353.615
	230.656	121.674	190.867	283.483
	182.542	87.031	180.093	307.987
	278.77	117.449	200.268	362.064
	248.735	121.674	190.339	288.553
	267.689	103.93	174.389	358.262
	173.502	135.616	232.801	301.227
	200.912	111.112	214.739	379.386
	195.08	161.809	202.803	323.619
	227.448	142.375	287.199	373.049
	185.166	110.689	183.368	367.979
	253.692	186.736	213.471	446.983
	131.22	136.461	251.497	369.669
	256.608	112.802	175.023	323.619
	170.003	158.007	208.507	501.905
	183.416	117.872	250.018	373.471
	171.169	131.813	176.291	252.642
	242.32	100.972	220.231	325.309
	238.82	195.608	260.475	278.836
	258.649	130.968	168.369	321.929
	202.662	91.678	167.101	265.317
		179.976	185.375	322.774
		151.67	247.483	361.642
		134.348	196.677	373.049
		136.461	207.873	252.22
		162.232	177.453	290.665
		179.131	212.098	280.103
		151.247	239.878	240.813
		133.081	201.219	310.099
		162.654	173.967	394.595
		182.933	214.422	441.49
		291.51	176.608	362.064
		209.972	159.813	273.766
		201.522	219.703	281.793
		179.976	223.823	350.657
		194.763	248.645	389.103
		184.623	175.657	277.146
		207.437	214.95	193.495
		248.84	186.325	297.848
		280.948	269.453	350.235
		221.379	206.183	494.3
		192.65	187.804	424.591
		215.464	192.557	313.057
		159.697	269.137	351.925
		115.337	284.452	343.898
		261.514	217.591	340.518
		170.681	220.443	378.541
		145.755	356.807	478.669
		245.46	317.302	234.053
		192.65	358.18	200.677
		149.558	206.077	392.905
		176.596	284.558	246.305
		181.243	224.456	281.371
		153.36	226.041	283.061
		184.201	280.016	245.883
		139.418	276.636	392.06
		136.038	289.839	667.094
		206.592	298.923	420.366
		179.131	216.534	401.355
		116.182	244.526	237.856
		187.158	204.387	365.867
		116.604	244.314	225.604
		190.96	213.049	401.355
		164.344	220.02	344.32
		123.364	341.385	404.312
		127.589	205.338	345.588
		142.375	269.242	286.863
		156.74	141.645	280.526
		132.658	160.552	222.224
		172.794	190.762	272.076
		171.949	137.526	177.864
		147.868	209.246	171.104
		148.713	181.044	269.964
		168.147	150.412	294.045
		144.065	171.749	182.933
		194.763	189.388	158.43
		153.36	204.176	177.441
		147.445	183.685	154.627
		139.841	235.336	147.868
		163.077	197.839	213.774
		200.677	268.925	165.189
		159.697	360.504	389.526
		120.829	302.303	314.747
		136.883	185.586	151.67
		158.43	240.617	264.049
		136.038	239.667	164.344
		169.837	229.527	171.104
		138.151	254.454	226.026
		102.24	193.825	325.309
		97.17	170.059	266.584
		156.317	182.945	348.545
		138.573	214.105	409.805
		196.453	188.227	328.689
		139.841	586.861	326.576
		128.856	624.57	278.414
		190.115	364.517	282.638
		227.294	481.235	348.123
		196.875	440.252	260.669
		123.364	512.289	314.324
		180.821	679.918	362.909
		99.705	340.434	245.46
		144.488	262.271	299.538
		124.209	232.484	265.739
		98.438	327.231	277.991
		154.627	308.958	177.441
		136.883	199.317	181.666
		141.953	398.318	260.669
		111.112	394.832	323.196
		130.546	327.654	384.033
		133.081	198.261	256.445
		152.515	147.772	219.267
		143.22		163.077
		152.937		180.398
		133.503		212.084
		119.562		134.771
		91.678		142.375
		105.62		262.782
		139.841		229.406
		171.949		253.91
		132.236		111.957
		142.375		224.759
		104.775		143.643
		155.05		228.984
		131.813		200.677
		133.503		156.74
		153.36		156.317
		109.422		226.871
		98.015		191.805
		94.213		282.216
		133.081		131.391
		151.247		242.08
		140.685		198.565
		110.689		169.414
		129.279		204.057
		145.333		210.817
		134.348		159.697
		129.279		327.421
		129.279		183.356
		103.507		230.673
		103.93		430.506
		199.833		272.076
		85.763		223.914
		124.209		163.922
		138.573		299.538
		110.689		336.716
		122.096		245.883
		150.402		328.689
		83.228		368.402
		185.046		251.797
		141.53		186.313
		126.321		110.267
		179.554		143.22
		90.41		219.267
		142.375		406.425
		111.534		189.693
		152.515		188.848
		203.212		122.941
		142.798		312.212
		79.426		329.534
		121.674		147.868
		116.604		308.41
		136.038		324.041
		132.658		332.491
		176.596		260.247
		142.798		332.491
		173.216		307.987
		128.856		250.952
		110.267		140.685
		99.705		343.475
		104.352		333.758
		106.042		292.778
		117.027		305.03
		149.98		369.669
		115.337		292.778
		139.418		427.971
		138.996		172.371
		151.247		348.545
		127.589		264.894
		127.166		231.518
		116.182		458.39
		113.224		354.46
		114.492		296.58
		92.1		363.754
		92.523		198.988
		90.833		337.138
		118.294		384.878
		141.953		369.247
		118.294		250.952
		107.31		255.177
		112.379		196.875
		169.837		416.987
		184.623		298.693
		122.096		177.864
		217.154		216.309
		125.054		158.007
		136.883		231.518
		139.418		97.593
		103.085		242.925
		137.306		226.449
		131.391		269.119
		121.674		329.111
		217.999		204.902
		196.03		197.72
		155.05		239.968
		163.499		306.72
		140.263		256.867
		130.546		205.747
		115.337		233.208
		119.139		157.585
		105.62		146.6
		149.98		227.716
		159.697		269.964
		122.519		245.883
		149.135		201.945
		126.744		144.91
		131.813		152.937
		98.86		158.852
		146.6		181.243
		87.031		318.972
		107.31		218.422
		100.972		231.096
		152.937		229.406
		167.302		268.274
		116.182		178.709
		123.786		161.809
		141.53		448.673
		106.465		376.851
		162.654		447.828
		144.488		488.386
		182.511		343.053
		107.732		178.286
		121.251		348.968
		136.038		630.338
		168.992		428.816
		144.488		228.984
		77.736		290.665
		167.724		196.875
		129.279		232.363
		125.476		519.649
		109		342.208
		145.333		238.278
		136.038		289.398
		111.957		278.836
		160.542		248.418
		128.011		296.158
		101.395		196.875
		99.705		229.829
		80.271		305.452
		180.398		368.402
		143.643		370.514
		113.647		286.018
		108.155		264.049
		109.422		169.837
		179.554		463.037
		118.294		273.344
		141.953		315.592
		144.065		391.215
		167.724		352.347
		107.31		387.836
		136.038		301.65
		115.337		358.685
		81.961		264.472
		93.79		499.37
		106.887		286.441
		81.961		267.007
		106.465		220.534
		163.499		312.634
		93.368		330.801
		115.759		295.313
		111.957		261.514
		113.647		144.488
		114.914		188.003
		115.759		249.263
		97.17		339.251
		111.957		212.507
		131.813		191.805
		120.829		155.472
		171.949		106.465
		159.275		152.937
		191.383		296.58
		142.375		257.29
		67.174		234.476
		265.739		212.507
		171.104		216.309
		172.371		212.084
		111.112		232.786
		133.081		212.929
		115.337		133.503
		121.674		223.069
		128.011		215.464
		152.092		211.662
		129.279		226.449
		133.503		173.216
		136.883		202.79
		106.042		232.363
		111.957		277.146
		128.434		201.522
		121.674		243.77
		137.306		237.856
		147.023		243.348
		128.011		252.22
		99.705		124.631
		111.112		174.061
		163.077		107.732
		201.1		187.581
		137.728		199.833
		141.953		135.616
		170.681		112.802
		145.333		131.813
		113.224		124.209
		139.418		153.782
		168.992		193.073
		167.724		331.646
		104.775		212.507
		130.546		183.778
		155.895		198.988
		160.119		168.992
		149.558		173.639
		109		192.65
		144.91		171.526
		134.771		184.201
		144.91		184.201
		155.05		209.55
		153.36		170.681
		147.445		223.069
		153.782		122.519
		135.193		272.076
		114.914		292.778
		109		389.526
		109.845		344.743
		167.302		340.94
		113.224		306.297
		195.608		316.437
		121.251		329.111
		150.402		237.011
		155.05		210.394
		229.406		278.414
		161.387		228.984
		163.922		229.406
		160.542		251.375
		155.895		321.084
		119.562		344.32
		107.732		281.371
		125.054		236.166
		172.371		254.755
		139.418		280.948
		124.209		329.956
		144.065		355.305
		149.558		202.367
		136.038		288.131
		93.368		279.259
		158.007		236.166
		160.964		276.301
		136.461
		174.061
		148.29
		121.674
		146.178
		170.681
		116.604
		229.406
		128.856
		161.387
		135.616
		144.91
		144.065
		107.732
		150.825
		144.065
		54.922
		83.651
		114.492
		84.496
		99.283
		101.817
		116.182
		134.348
		111.112
		114.069
		192.228
		147.023
		142.798
		123.364
		163.922
		151.247
		111.957
		91.255
		237.856
		157.162
		94.213
		93.79
		119.984
		123.364
		146.6
		164.767
		187.581
		148.713
		141.53
		151.247
		114.914
		196.03
		139.841
		201.522
		125.899
		139.418
		185.468
		174.061
		141.953
		102.662
		133.926
		102.662
		109.422
		86.608
		110.267
		119.562
		115.759
		99.705
		106.887
		113.647
		76.469
		76.046
		92.523
		95.903
		191.805
		258.557
		202.367
		256.022
		219.267
		208.282
		140.685
		151.247
		173.216
		128.011
		149.558
		160.964
		103.507
		128.434
		100.127
		149.558
		126.321
		124.209
		190.96
		152.515
		156.74
		176.174
		135.193
		122.941
		142.375
		138.996
		84.918
		107.31
		172.371
		182.511
		177.019
		81.116
		142.375
		149.558
		122.519
		136.038
		134.771
		135.616
		116.604
		175.329
		130.123
		158.852
		156.74
		146.6
		156.317
		157.162
		120.829
		122.096
		109.422
		143.643
		194.763
		97.593
		149.558
		124.209
		114.069
		103.507
		114.914
		144.91
		54.5
		136.883
		106.887
		201.522
		136.038
		121.251
		141.53
		152.937
		139.418
		110.267
		163.499
		164.767
		129.279
		133.926
		147.445
		190.96
