# Supplementary material for: Myopalladin knockout mice develop cardiac dilation and show a maladaptive response to mechanical pressure overload
Source: eLife journal article supplement (doi:10.7554/elife.58313), 2021-09-24
Supplement: supp [file elife_poa_e58313_Figure_6_source_data_1.xlsx]

## Sheet: Figure 6A, C
Figure 6–source data 1: qRT-PCR and densitometry analysis on WT and MKO male mice subjected to TAC or SHAM.
A	qRT-PCR analyses
		Mypn (fold change)				Palld (fold change)				Ankrd1 (fold change)				Nppa (fold change)				Nppb (fold change)				Acta1 (fold change)				Actc1 (fold change)				Myh6 (fold change)				Myh7 (fold change)				Casq2 (fold change)
	WT	Basal	TAC 4D	TAC 4W		Basal	TAC 4D	TAC 4W		Basal	TAC 4D	TAC 4W		Basal	TAC 4D	TAC 4W		Basal	TAC 4D	TAC 4W		Basal	TAC 4D	TAC 4W		Basal	TAC 4D	TAC 4W		Basal	TAC 4D	TAC 4W		Basal	TAC 4D	TAC 4W		Basal	TAC 4D	TAC 4W
		1.013	0.451	0.873		1.023	0.4117	0.5976		0.9573	2.5675	7.4591		1.0133	16.9937	10.325		1.3933	3.139	6.3108		1.1048	2.5272	12.7572		1.099	1.2	2.167		0.6008	0.6065	1.9557		0.8037	0.919	8.5217		1.3067	0.4113	0.8049
		0.862	0.547	1.031		0.8493	0.613	0.9327		0.8444	3.345	4.0306		0.7584	25.3181	5.52		0.8137	5.2325	4.6444		0.3924	2.7021	5.1846		0.901	0.942	1.167		1.2986	0.9092	2.107		1.1963	1.379	5.1467		1.1838	0.5713	0.8891
		1.125	0.6	0.775		1.1277	0.7055	0.6574		1.1983	3.1587	4.3848		1.2282	10.7401	5.157		0.7931	4.165	3.1843		1.5029	3.7164	9.2539			1.046	1.055		1.2167	1.0147	1.9469			1.458	3.6004		0.5096	0.6137	0.9259
			0.813	1.341			0.8082	1.1095			4.7175	4.8434			24.1106	9.076			6.3974	4.1655			3.8417	14.2139				1.929			1.6018	3.4466			3.3	4.9422			0.7034	1.1293
			1.089	0.694			1.1383	0.5855			3.9463	3.4414			21.3712	8.853			6.5864	3.1016			5.4669	5.8899				1.592			1.9241	1.0978			3.376	8.0872			1.0177	0.7575
			0.466				0.4286				2.3131				7.5288				4.291				5.2473					0.98			0.7078				2.693				0.3755
			0.748				0.5454				2.8899				13.516				3.671				3.7031								0.8859				9.056				0.6344
			0.452				0.3918				2.2168				18.2029				5.1748				3.417								0.8752				3.558				0.4146
	Average	1	17.22	7.79		1	17.22	7.79		1	3.14435	4.83186		0.999967	17.2227	7.7862		1.00003	4.83214	4.28132		1.00003	3.82771	9.4599		1	17.22	7.79		1.0387	1.06565	2.1108		1	17.22	7.79		1	17.22	7.79
	SEM	0.14	2.24	1.03		0.14	2.24	1.03		0.104369	0.301994	0.695621		0.135783	2.23981	1.03188		0.196723	0.438301	0.585629		0.324825	0.374578	1.79636		0.14	2.24	1.03		0.220223	0.161407	0.37825		0.14	2.24	1.03		0.14	2.24	1.03
	MKO	Basal	TAC 4D	TAC 4W		Basal	TAC 4D	TAC 4W		Basal	TAC 4D	TAC 4W		Basal	TAC 4D	TAC 4W		Basal	TAC 4D	TAC 4W		Basal	TAC 4D	TAC 4W		Basal	TAC 4D	TAC 4W		Basal	TAC 4D	TAC 4W		Basal	TAC 4D	TAC 4W		Basal	TAC 4D	TAC 4W
		0.001	0.011	0.006		0.4355	1.2833	0.645		0.6008	9.2418	6.8353		0.9717	10.6967	8.728		1.2496	19.5012	3.0451		0.2877	7.8122	19.5135		0.744	0.878	1.789		0.4448	3.807	2.5135		0.68	8.422	9.7111		0.657	1.2409	0.7511
		0.001	0.002	0.007		1.1048	0.979	1.1164		1.2986	6.6392	12.2144		1.3576	20.8012	23.346		0.6413	6.507	7.2878		0.3735	6.8736	30.2263		1.172	0.596	1.451		1.1556	1.0967	3.4935		1.1338	4.279	13.9301		1.2587	0.8946	1.3821
		0.001	0.001	0.004		0.6811	0.6794	1.2246		1.2167	4.2033	6.8638		0.6244	10.7748	9.498		0.5639	5.5539	3.7282		0.4242	5.711	9.6447			0.932	1.709		0.9761	1.4119	3.0413			2.162	14.297		0.7594	0.6976	1.1091
			0.002	0.002			1.141	0.6056			6.9862	8.0753			21.5099	26.43			13.9191	5.417			8.2434	5.5222			1.627	2.446			2.4677	1.8963			4.156	4.3113			1.1407	0.5477
			0.002	0.003			0.7812	0.3181			3.8198	5.1694			17.3107	15.6			4.7766	3.9454			3.7757	10.8508			1.656	1.553			1.0194	0.9577			6.64	6.3239			0.7718	0.5012
			0.002	0.002			0.9515	0.6181			4.4322	8.3485			11.0701	22.755			7.7543	5.8138			4.3961	11.0176				1.925			2.5033	1.8015			4.851	16.0052			0.7075	0.7842
			0.001	0.003			0.6803	0.7676			4.3711	7.5528			7.5611	13.367			6.5432	6.1881			4.8341	14.8638				1.95			1.6281	1.7878			2.293	7.8171			0.7029	0.8981
				0.003				0.1423				5.6982				8.02				8.0808				12.7439				1.441				2.0536				6.9362				0.6766
	Average	0.001	0.003	0.00375		0.740467	0.927957	0.679712		1.0387	5.67051	7.59471		0.984567	14.2464	15.968		0.818267	9.22219	5.43827		0.3618	5.94944	14.2978		0.958	1.1378	1.783		0.858833	1.99059	2.19315		0.9069	4.68614	9.91649		0.8917	0.879429	0.831263
	SEM	0	0.00134519	0.000647798		0.195477	0.0872145	0.128549		0.220223	0	0.764529		0.211754	2.09619	2.58533		0.216821	2.0566	0.626608		0.039836	0.655109	2.68913		0.214	0.213453	0.117505		0.213403	0.377913	0.282354		0.2269	0.850023	1.52378		0.185866	0.08515	0.104111
C	Densitometry of Western blots
		MYPN				ANKRD1				CASQ2				Desmoplakin				SORBS2/ArgBP2
	WT	Basal	TAC 4D	TAC 4W		Basal	TAC 4D	TAC 4W		Basal	TAC 4D	TAC 4W		Basal	TAC 4D	TAC 4W		Basal	TAC 4D	TAC 4W
		1.12	1.11	0.67		1.1	9.87	8.71		0.48	1.1	4.58		1.36	1.77	0.88		0.43	1.13	1
		0.97	1.21	0.52		0.58	10.5	13.69		0.49	0.88	5.96		1.08	0.6	0.96		0.81	1.29	1.24
		1.86	1.18	0.35		0.62	19.54	28.28		0.39	1.65	4.99		1.27	0.51	1.82		1.14	1.41	2.08
		1.45	1.12	0.6		1.32	8.74	9.67		1.36	3.21	2.89		0.97	0.53	0.98		1.07	1.93	3.83
		1.04	0.65	0.35		0.91	14.41	12.05		2.28	1.69	4.21		0.85	1.64	2.02		1.2	1.98	3.07
		0.69	0.67	1.03		1.54	13.04	28.66			1.91	1.99		0.48	2.1	0.54		1.16	3.12	2.68
		0.53	0.74			0.79					2.21				1.74			0.88	2.71	2.08
											1.2							1.32
											0.95
											2.18
	Average	1.09429	0.954286	0.586667		0.9975	12.6833	16.8433		1	1.698	4.10333		1.00167	1.27	1.2		1.00125	1.93857	2.28286
	SEM	0.169998	0.0960371	0.103301		0.118875	1.61611	3.74592		0.365418	0.2276	0.589076		0.129445	0.261443	0.238104		0.100702	0.282273	0.37754
	MKO	Basal	TAC 4D	TAC 4W		Basal	TAC 4D	TAC 4W		Basal	TAC 4D	TAC 4W		Basal	TAC 4D	TAC 4W		Basal	TAC 4D	TAC 4W
		0	0	0		2.38	6.64	26.05		2.07	0.67	2.11		1.24	2.36	2.29		1.79	3.56	3.6
		0	0	0		1.83	10.75	18.12		2.16	0.58	3.18		0.93	6.28	2.02		1.5	4.45	5.12
		0	0	0		1.05	18.35	21.36		0.79	0.67	1.74		0.81	2.46	1.46		1.84	2.7	3.09
		0	0	0		0.66	17.93	21.25		0.62	1.71	2.05		1.07	2.35	1.82		2.2	4.09	5.58
		0	0	0		2.28	9.2	32.52		1.61	0.65	1.67		0.39	1.13	1.58		1.56	2.93	3.27
		0	0	0		4.89	8.25	14.52		1.03	0.41	2.3		1.48	2.83	2.61		1.7		2.88
		0	0	0		1.04		9.09		0.43	0.31	5.66		0.46		1.41		0.9		3.5
		0	0	0		1.04		20.65		0.91	0.33	5.24		1.64		1.16		1.03		2.16
								6.5			0.77					1.69
	Average	0	0	0		1.89625	11.8533	18.8956		1.2025	0.677778	2.99375		1.0025	2.90167	1.78222		1.565	3.546	3.65
	SEM	0	0	0		0.482904	2.06198	2.69014		0.233642	0.140057	0.561668		0.158517	0.715306	0.152751		0.151209	0.332304	0.404921
