# Supplementary material for: Myopalladin knockout mice develop cardiac dilation and show a maladaptive response to mechanical pressure overload
Source: eLife journal article supplement (doi:10.7554/elife.58313), 2021-09-24
Supplement: supp [file elife_poa_e58313_Figure_7_source_data_1.xlsx]

## Sheet: Figure 7A, B, D
Figure 7–source data 1: Analysis of sarcomere shortening, Ca2+ transients, and Ca2+ sparks in CMCs from WT and MKO mice subjected to TAC or SHAM.
	Parameter		0.5 Hz				1 Hz				2 Hz
			WT SHAM	MKO SHAM	WT TAC	MKO TAC	WT SHAM	MKO SHAM	WT TAC	MKO TAC	WT SHAM	MKO SHAM	WT TAC	MKO TAC
A		Average	5.544	6.148	6.693	7.752	5.024	6.457	6.687	6.767	5.4638	7.2195	6.767	6.311
		SEM	0.368	0.344	1.292	1.282	0.496	0.459	1.414	1.399	0.599	0.5943	1.399	1.356
	Time to 90% peak (ms)	Average	109	116	143	148	105	110	136	134	100	104	125	124
		SEM	3	3	4	4		3	4	4	3	3	2	3
	Time to 50% relaxation (ms)	Average	222	228	306	315	208	209	290	280	189	190	258	253
		SEM	9	10	10	9	7	6	8	7	7	7	6	6
B	Ca2+ transient amplitude (Fura 2 ratio)	Average	8.763	9.638	5.8529	4.3824	8.402	8.425	5.901	5.25	6.867	5.037	5.157	5.575
		SEM	2.166	2.492	1.7865	1.7753	2.223	2.754	1.737	1.603	1.062	1.42	2.135	1.6
	Time to 90% peak of Ca2+ transient (ms)	Average	60.7589	64.6575	72.2	75.3	61	68	71	74	59	72	75	75
		SEM	0.99433	1.27791	1.5	1.4	1	1	1	1	2	3	2	2
	Time to 50% relaxation of Ca2+ transient (ms)	Average	224.194	257.376	347.7	332.8	193.439	223.73	296	266	175	208	224	228
		SEM	13.6988	14.5175	15	13.7	8.38966	11.4086	10	10	6	9	5	6
D	Parameter		WT SHAM	MKO SHAM	WT TAC	MKO TAC
	Ca2+ spark frequency (sparks/100 μm/s)	Average	4.926	4.305	5.847	5.524
		SEM	0.561	0.681	0.587	0.665
	Amplitude (F/F0)	Average	0.083618	0.066648	0.070625	0.049911
		SEM	0.005985	0.006494	0.005663	0.004941
	Derivative (dF/dt)	Average	5.86309	4.16089	4.7761	3.10326
		SEM	0.38095	0.298298	0.387025	0.272064
	Time to peak (ms)	Average	14.5978	15.9704	15.066	17.1755
		SEM	0.401137	0.623543	0.375563	0.574675
	FWHM (μm)	Average	1.20437	1.16466	1.26547	1.19127
		SEM	0.025885	0.026939	0.03324	0.026722
	Tau (ms-1)	Average	48.9669	59.0864	58.9225	60.8518
		SEM	2.15366	2.46797	2.16839	2.25832
